# Supplementary material for: Facile two-step synthesis of 3-substituted indazoles using diazo(trimethylsilyl)methylmagnesium bromide
Source: Royal Society of Chemistry journal article supplement (doi:10.1039/b907796k), 2009-01-01

## Electronic Supplementary Information

### Facile two-step synthesis of 3-substituted indazoles using diazo(trimethylsilyl)methylmagnesium bromide

Yoshiyuki Hari,<sup>\*a</sup> Ryosuke Sone<sup>b</sup> and Toyohiko Aoyama<sup>\*b</sup>

<sup>a</sup>*Graduate School of Pharmaceutical Sciences, Osaka University, 1-6 Yamadaoka, Suita, Osaka 565-0871, Japan.*

<sup>b</sup>*Graduate School of Pharmaceutical Sciences, Nagoya City University, 3-1 Tanabe-dori, Mizuho, Nagoya 467-8603, Japan.*

### Contents

|                                                                             |              |
|-----------------------------------------------------------------------------|--------------|
| 1. <sup>1</sup> H and <sup>13</sup> C spectra for new indazoles             | Page 2 - 21  |
| 2. Characterization data for new diazo alcohols                             | Page 22 - 23 |
| 3. <sup>1</sup> H and <sup>13</sup> C spectra for unpurified diazo alcohols | Page 24 - 32 |

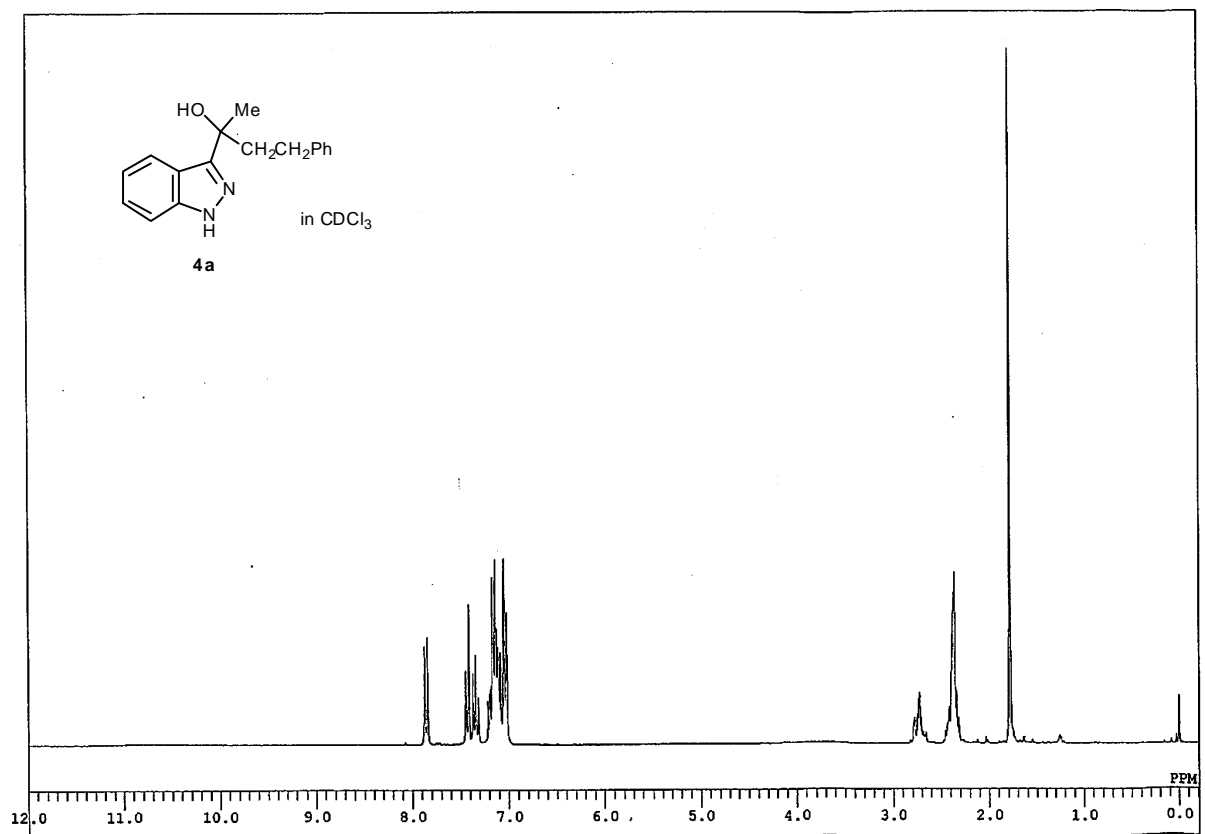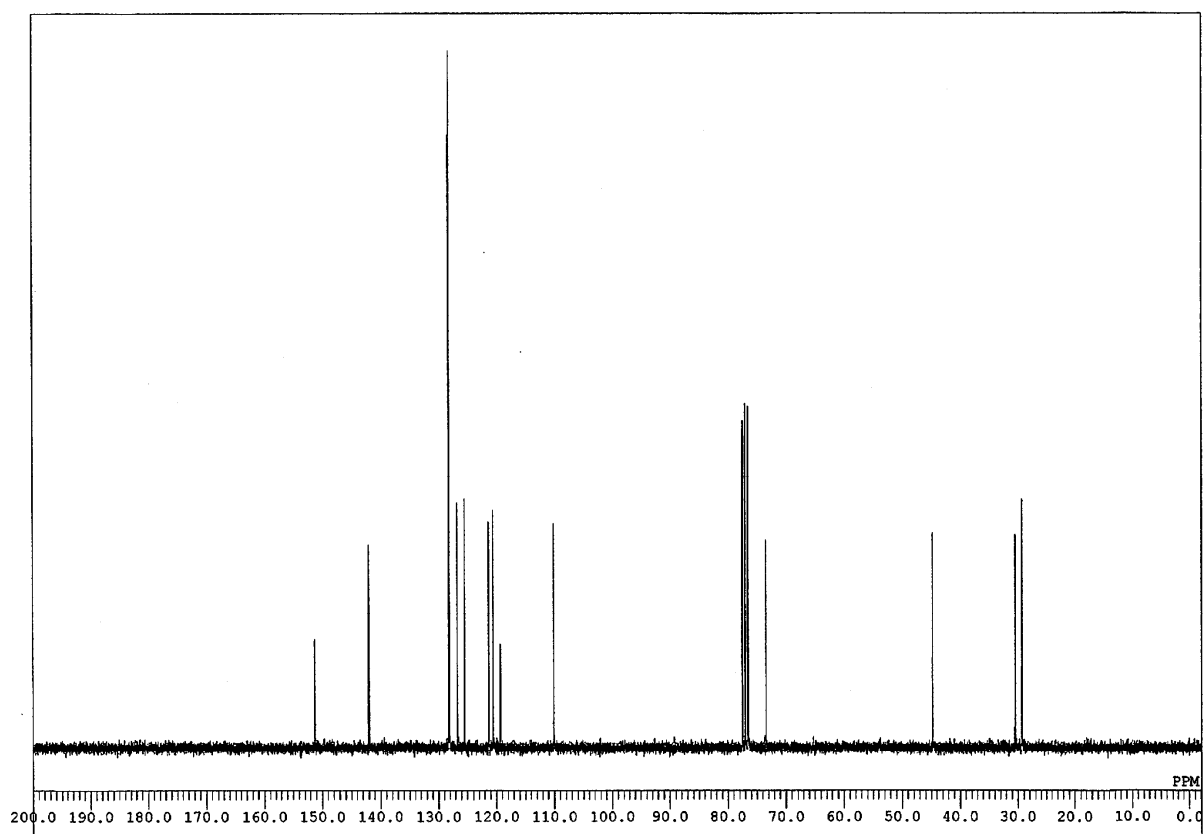

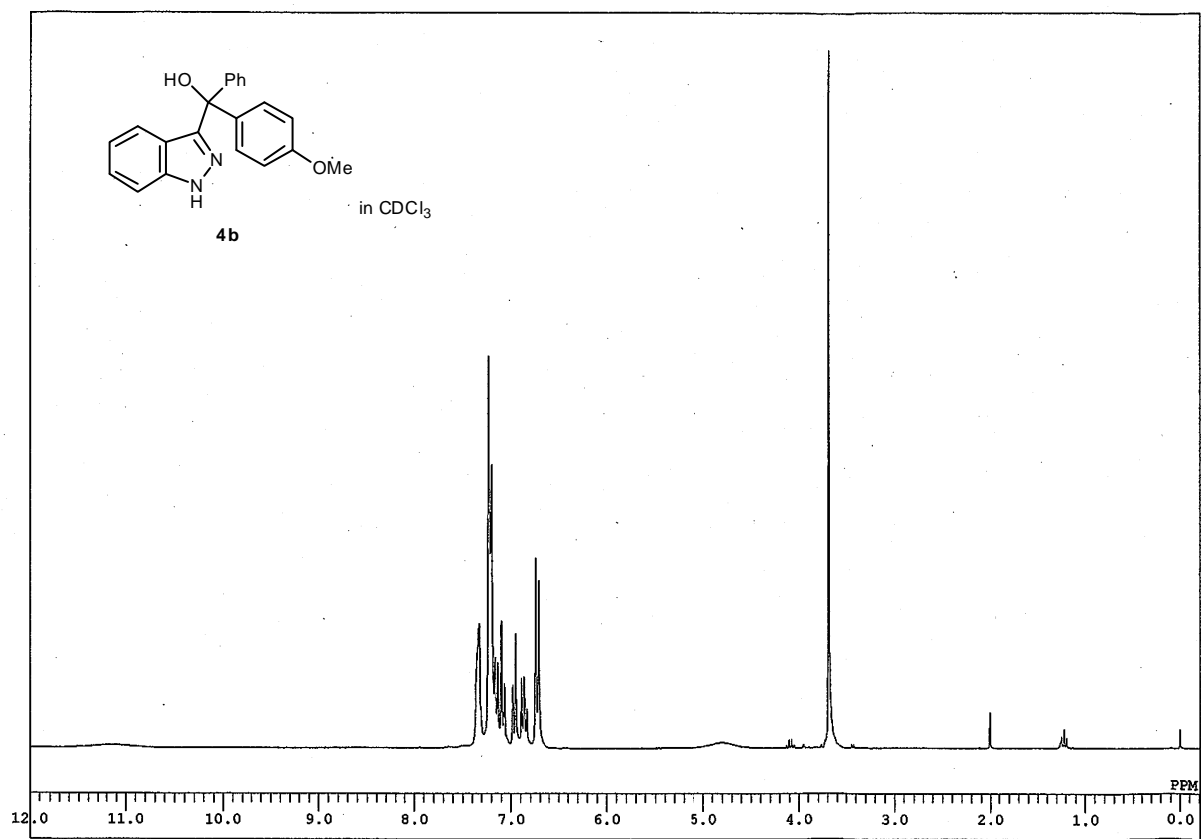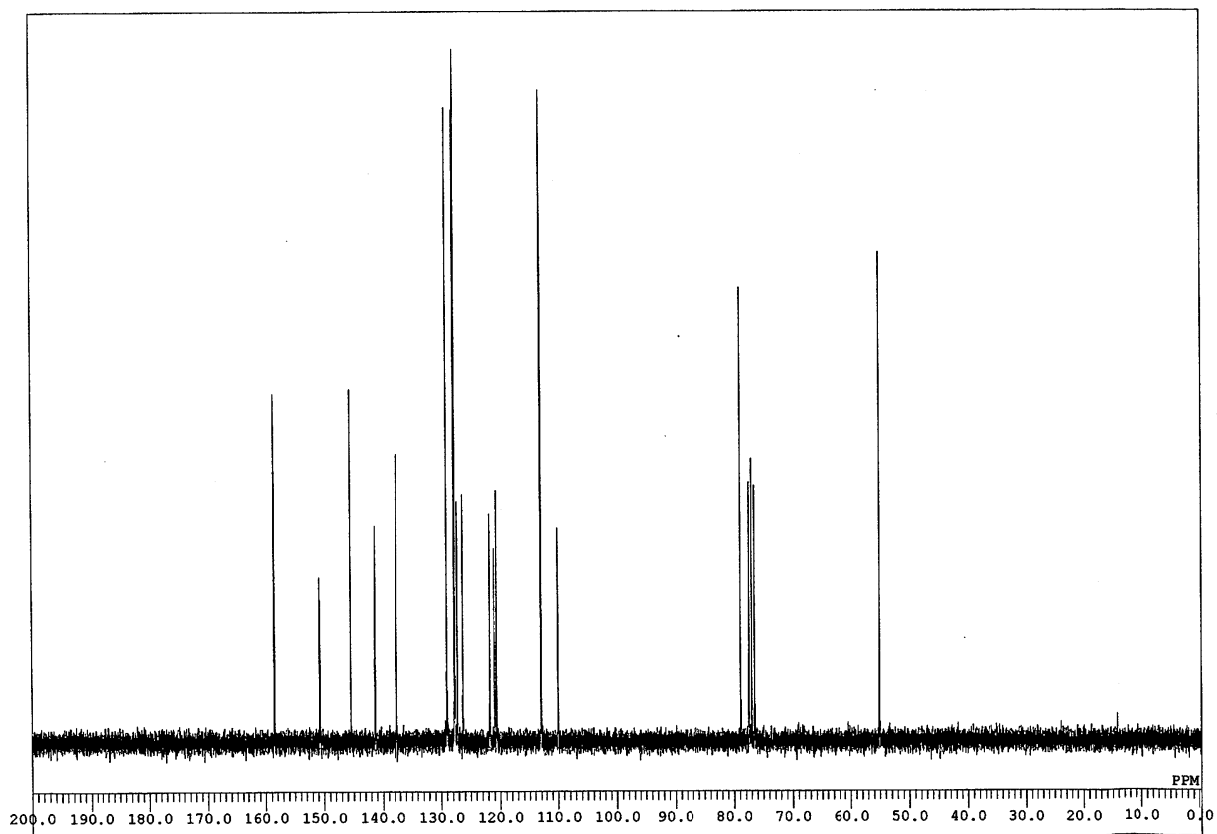

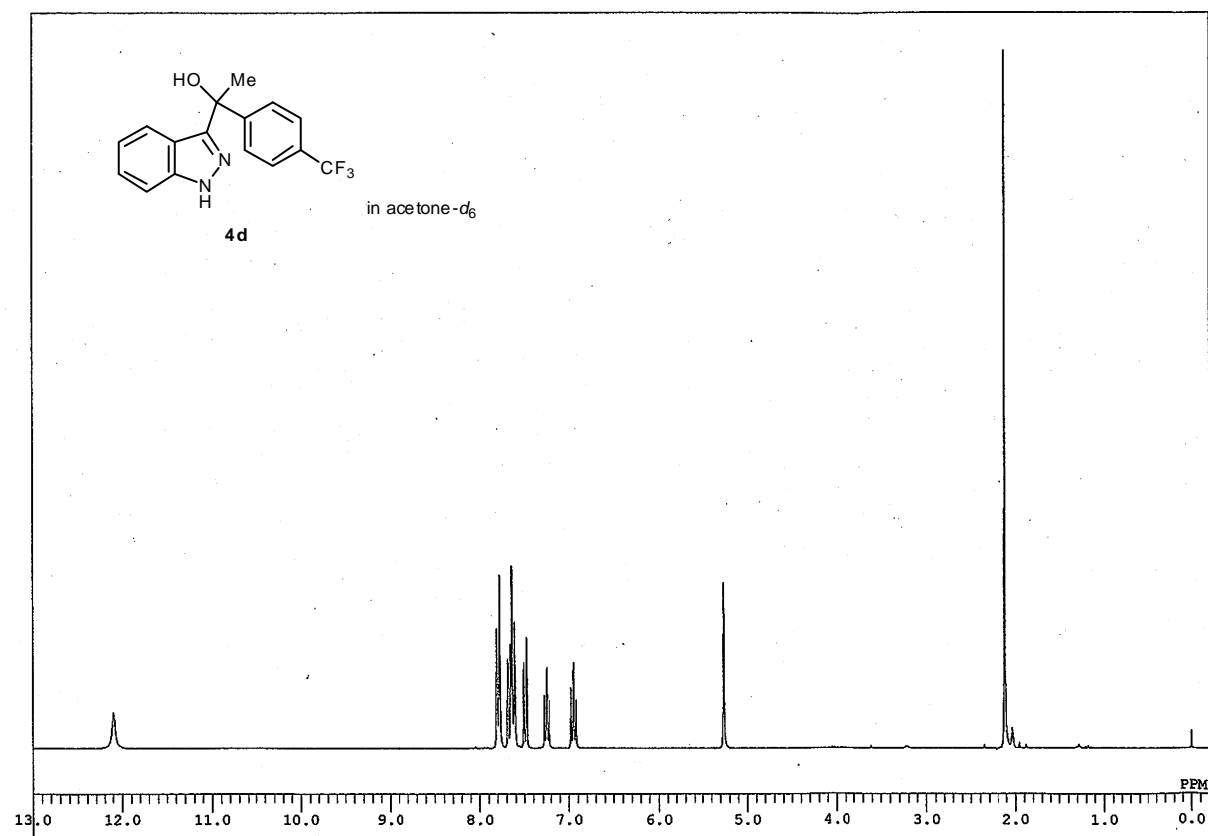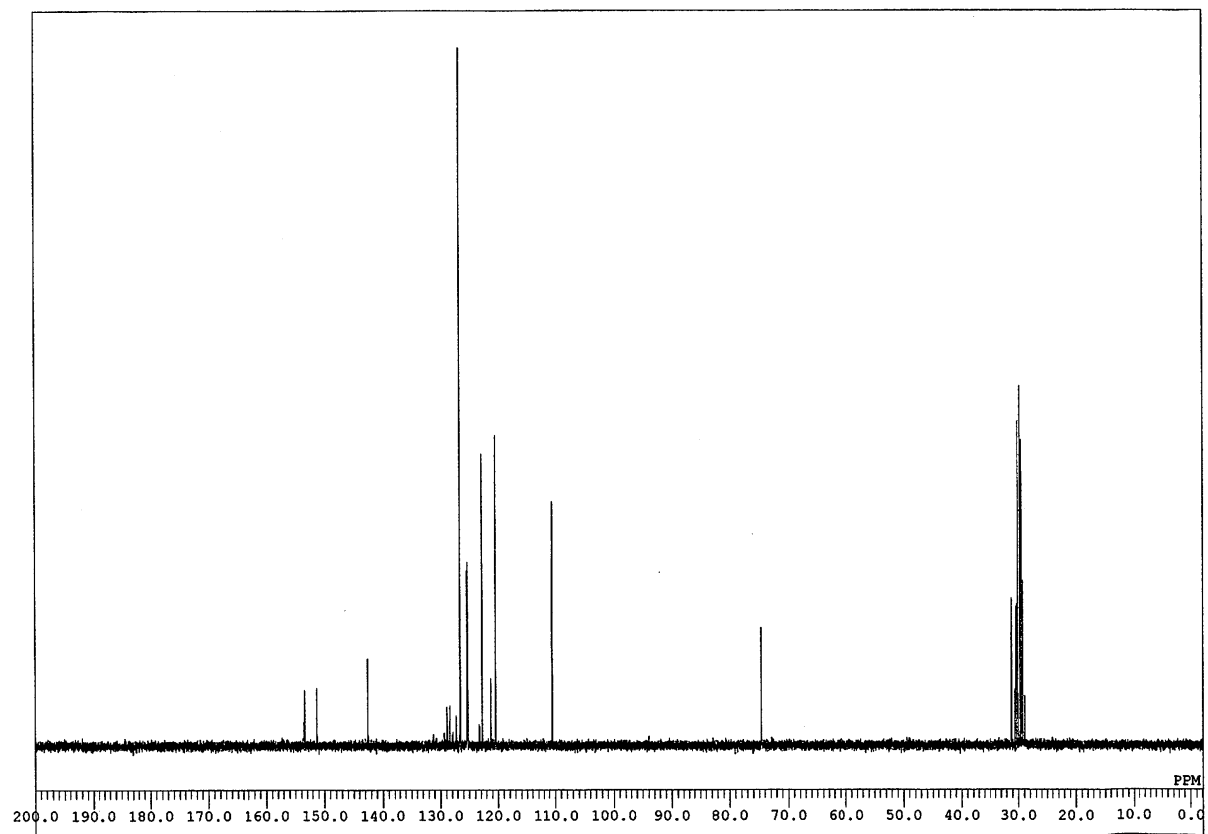

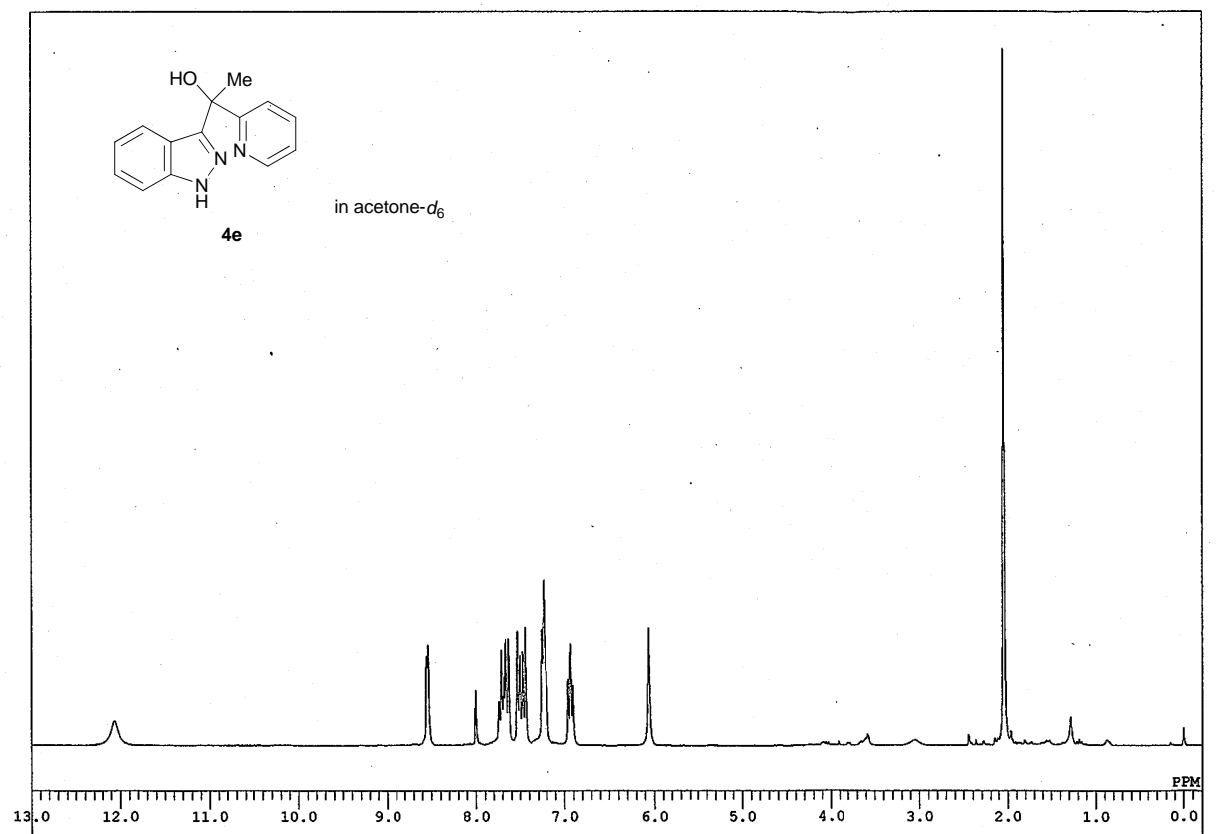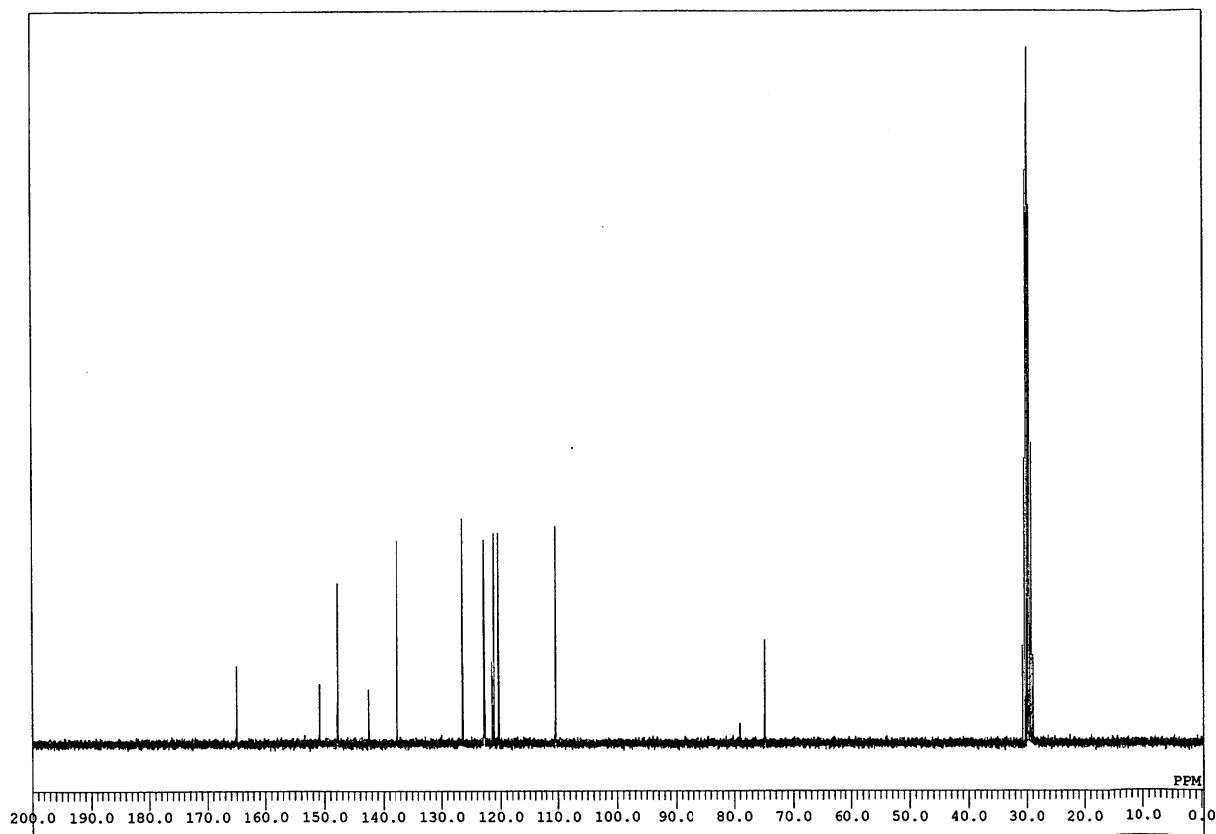

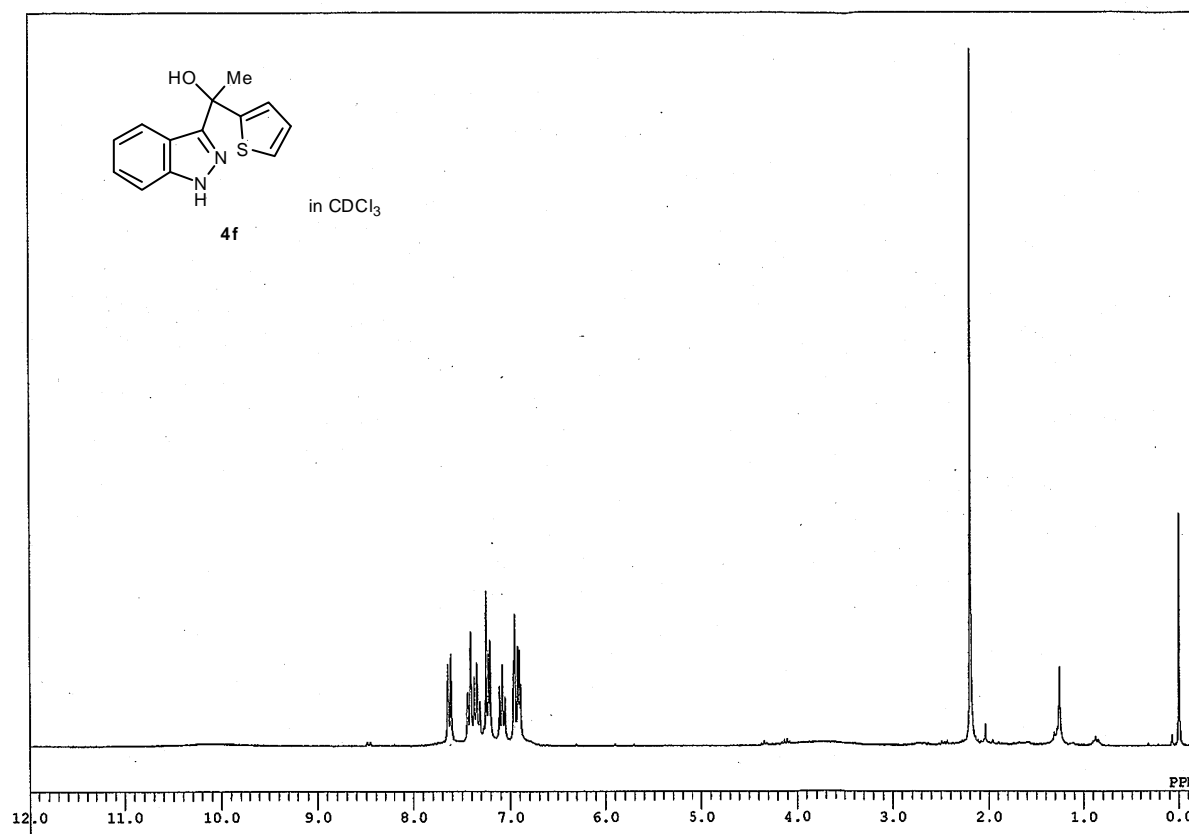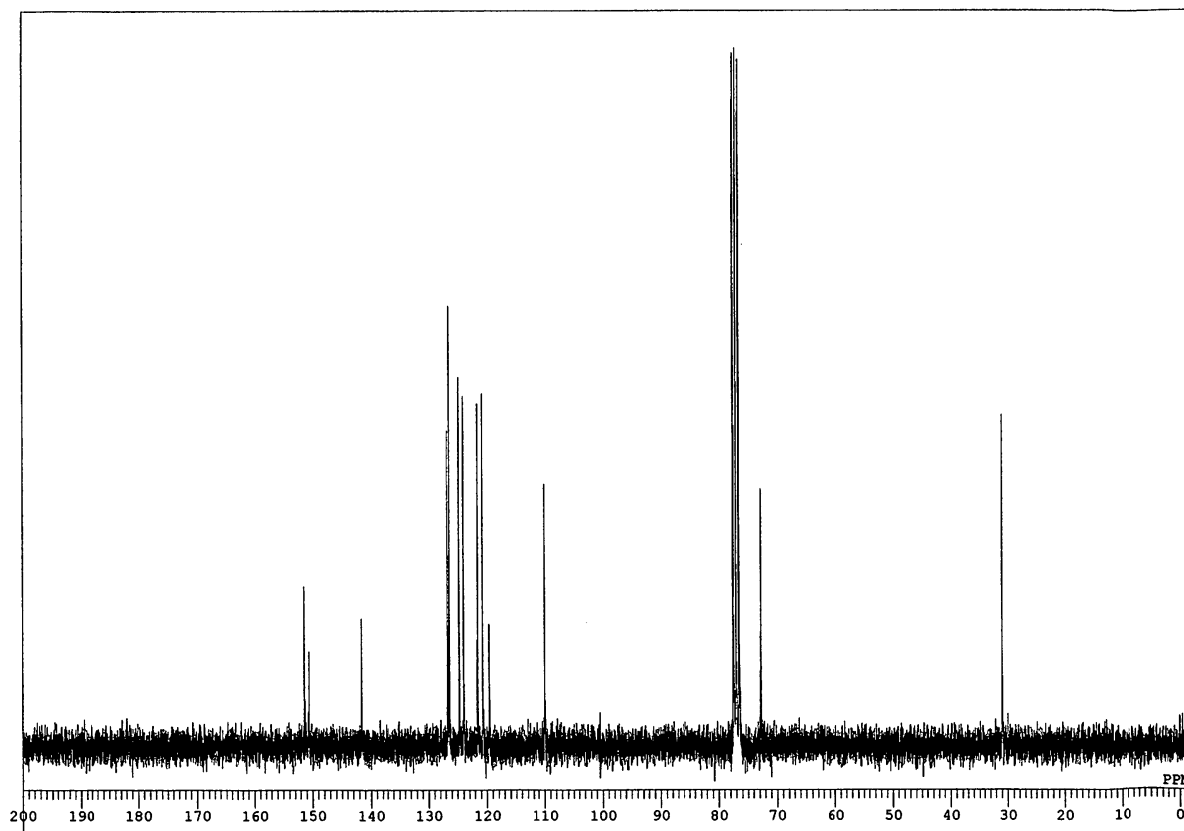

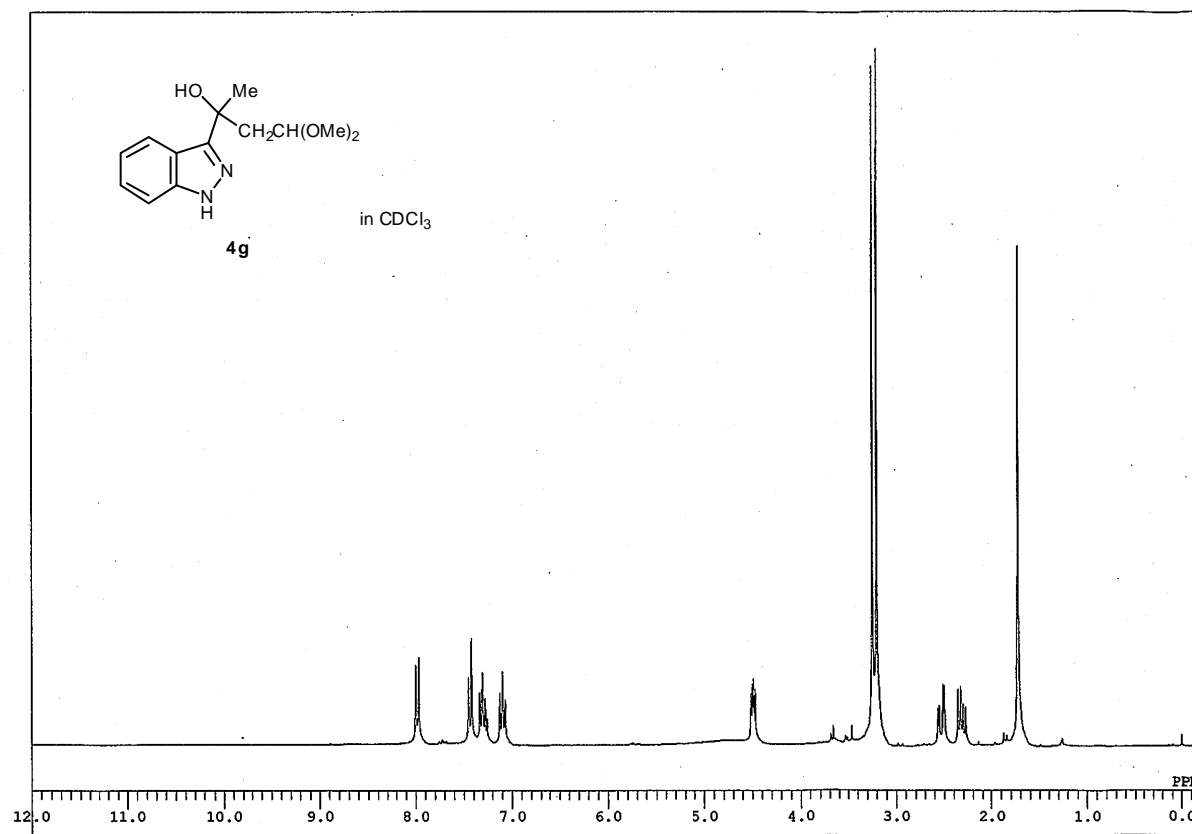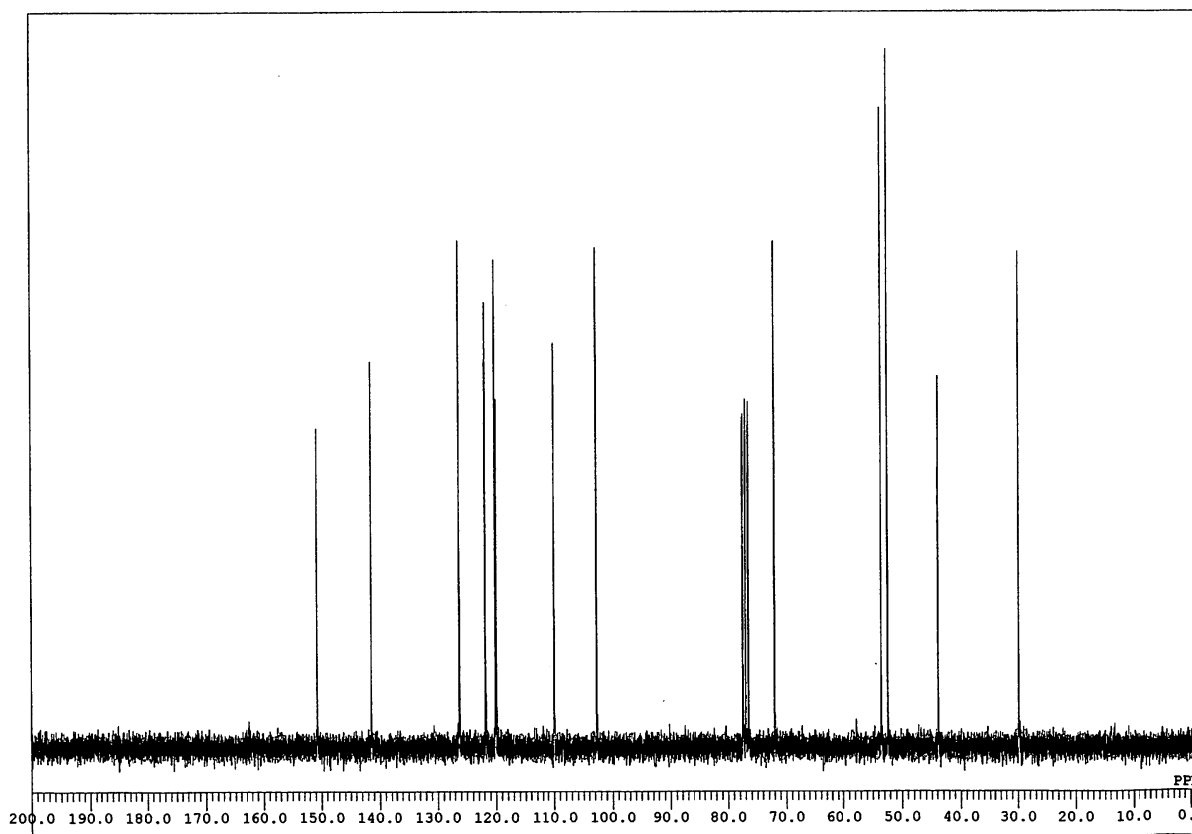

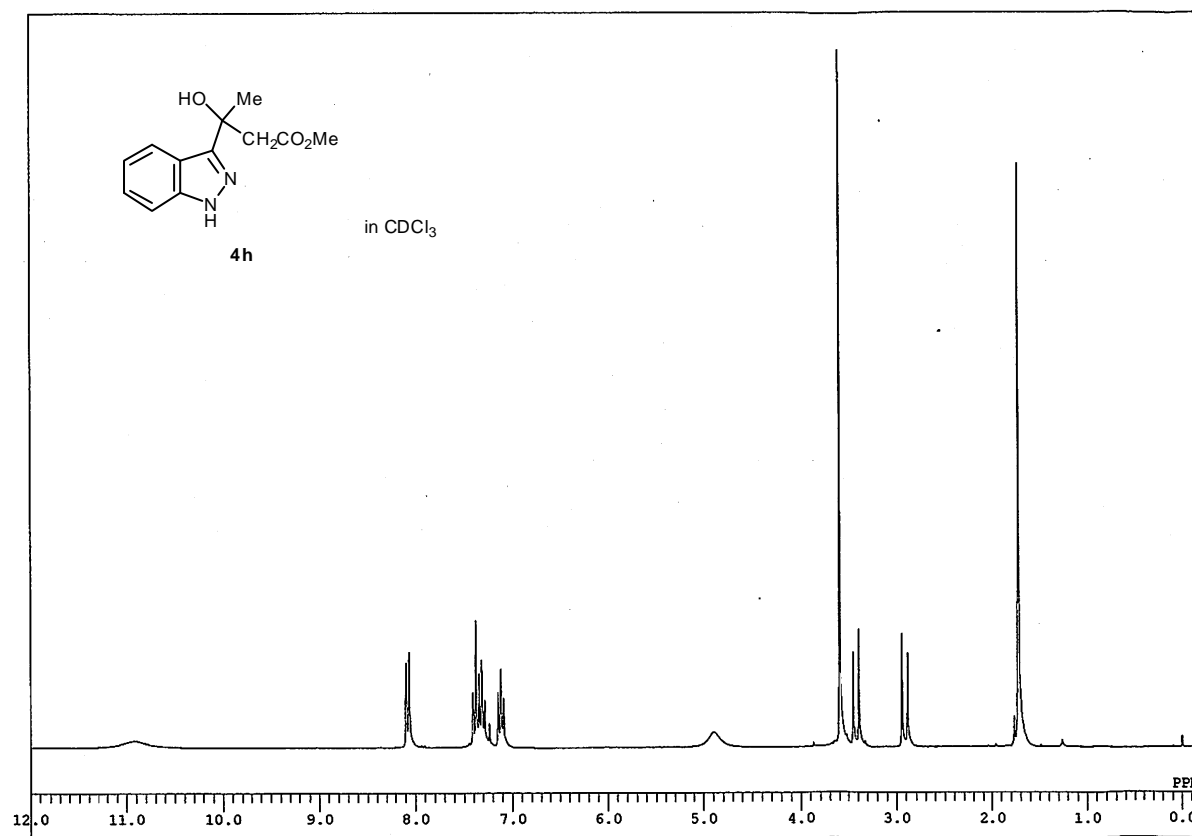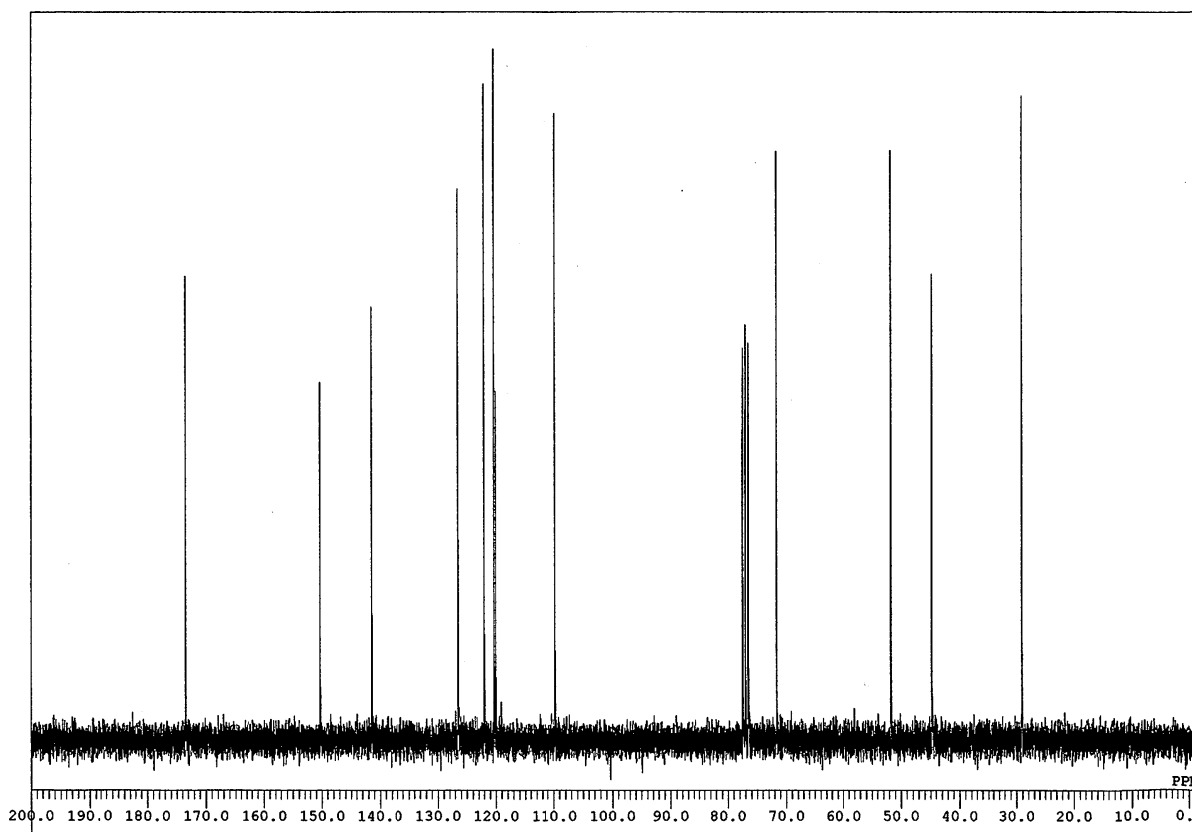



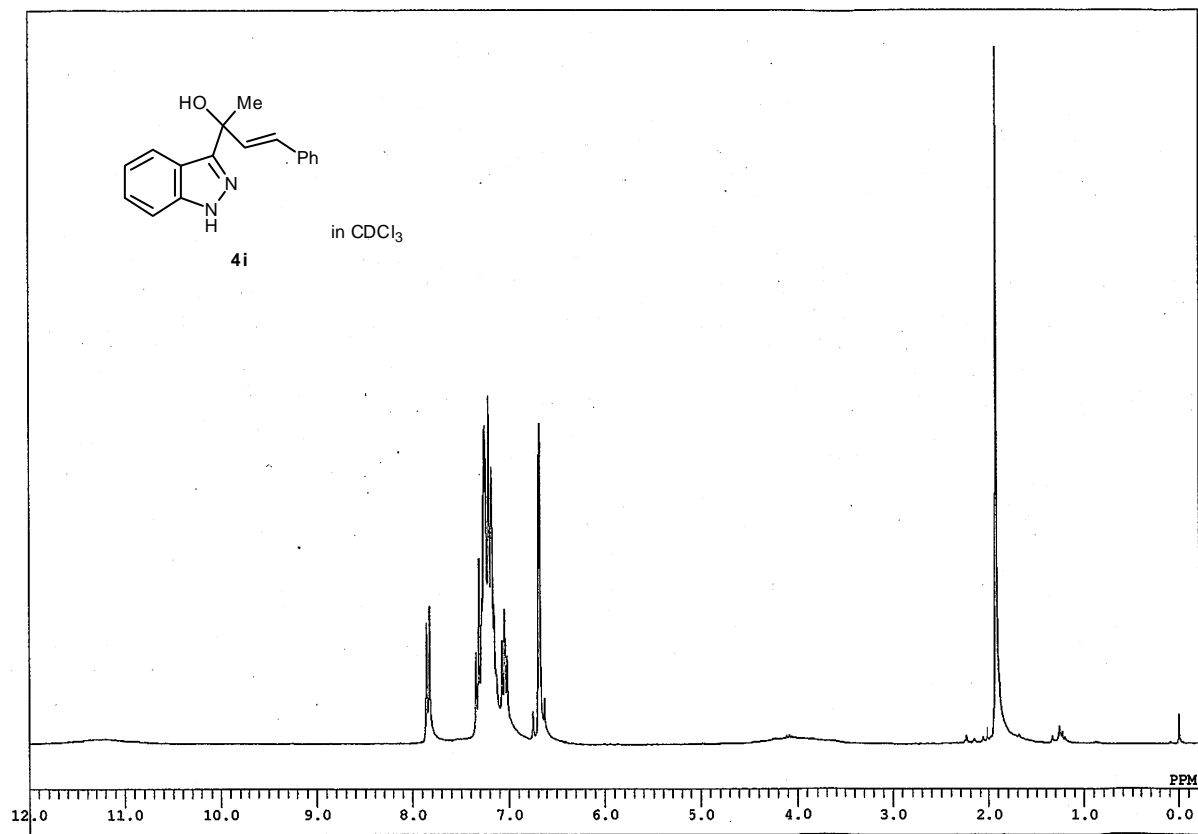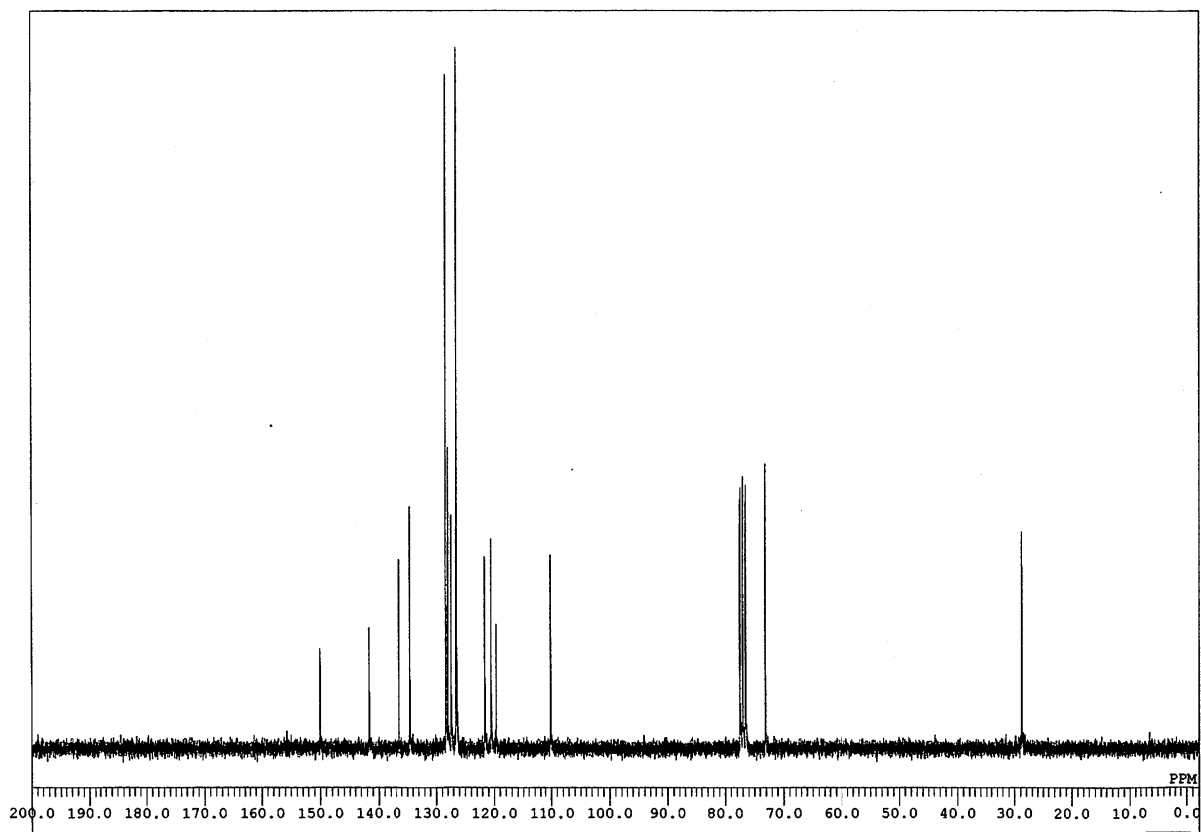

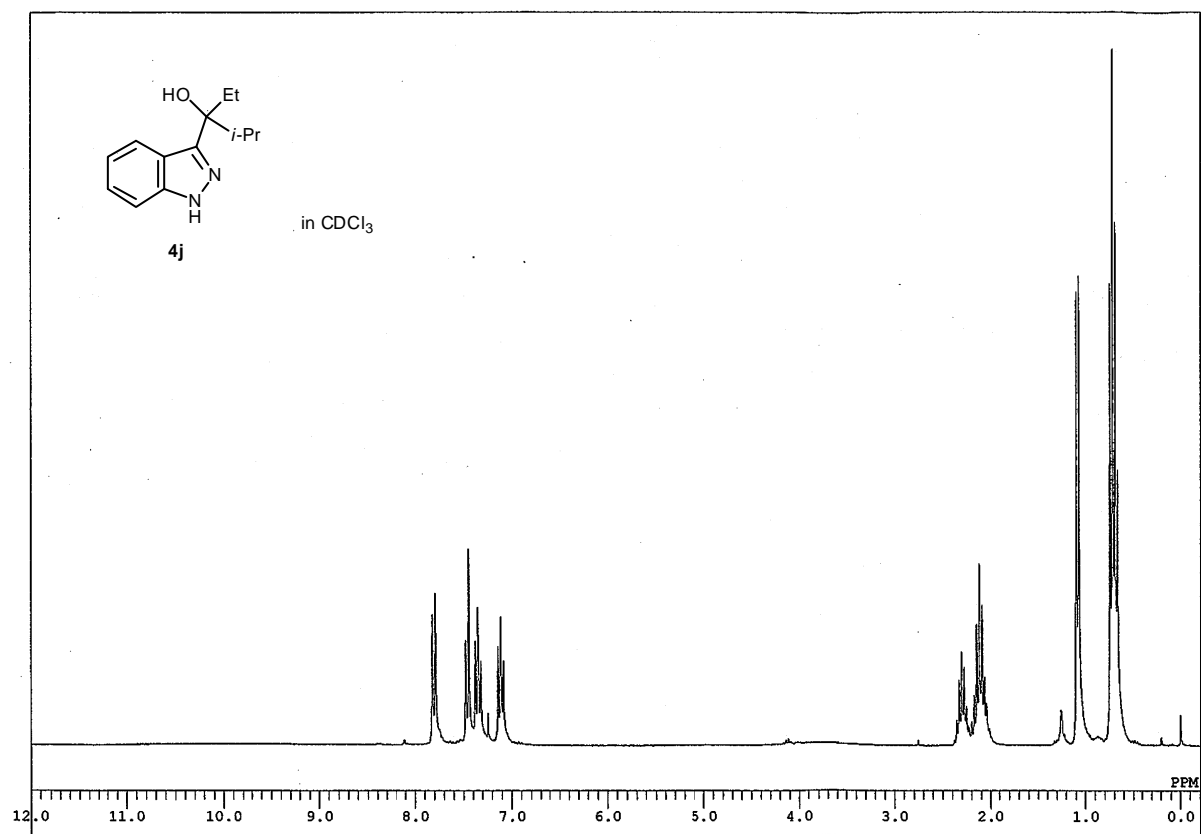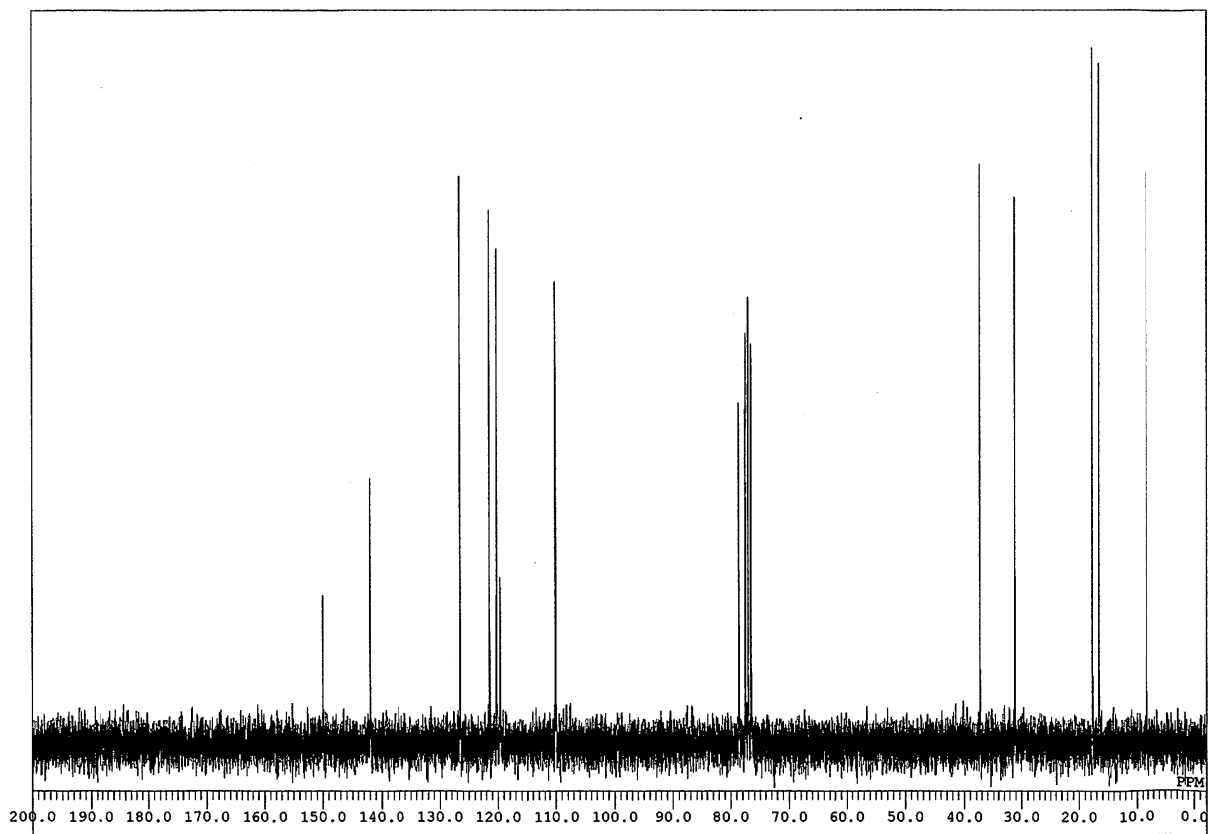

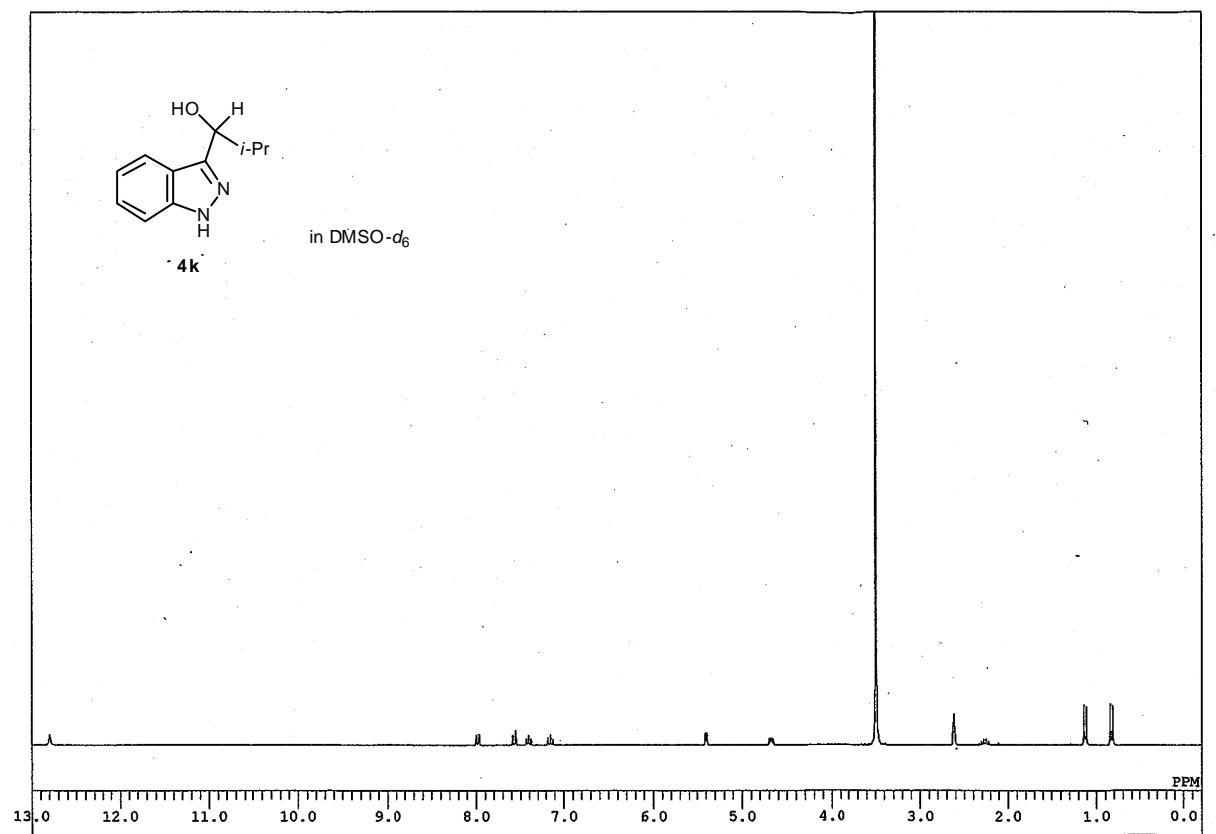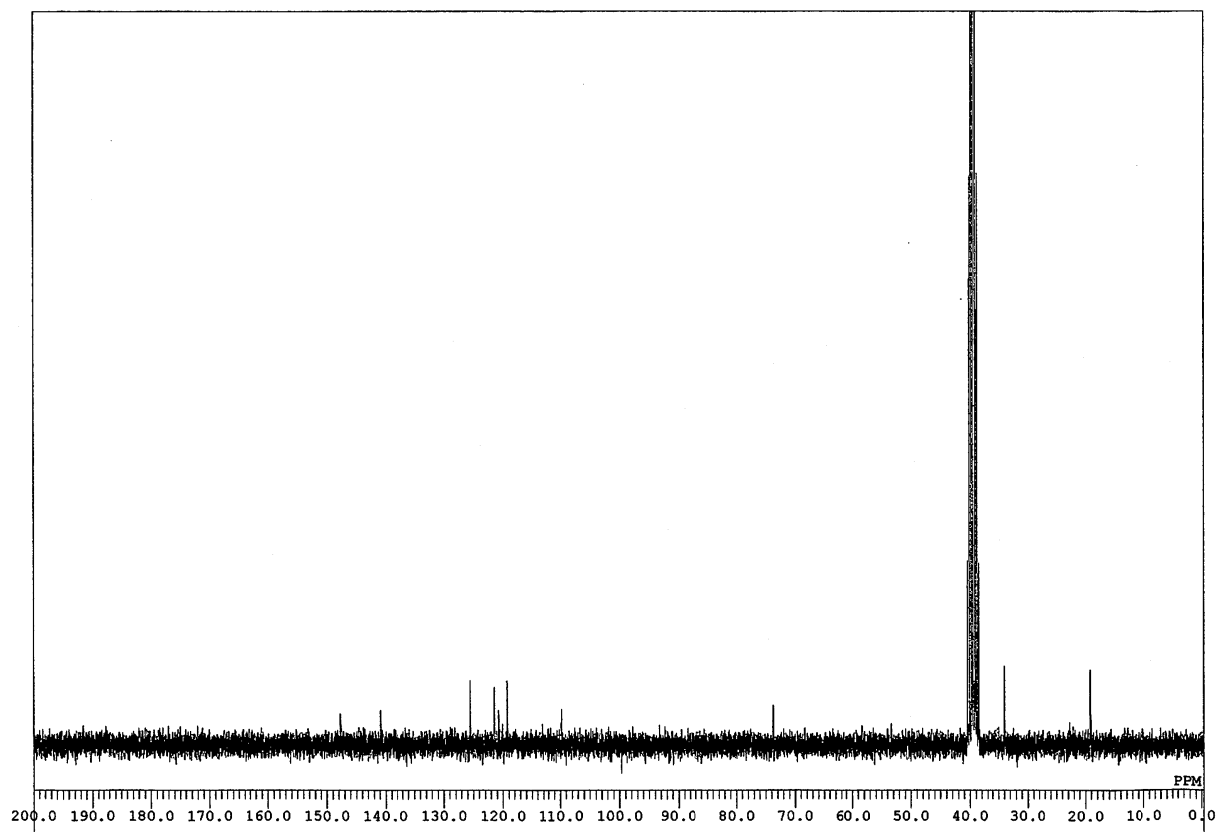

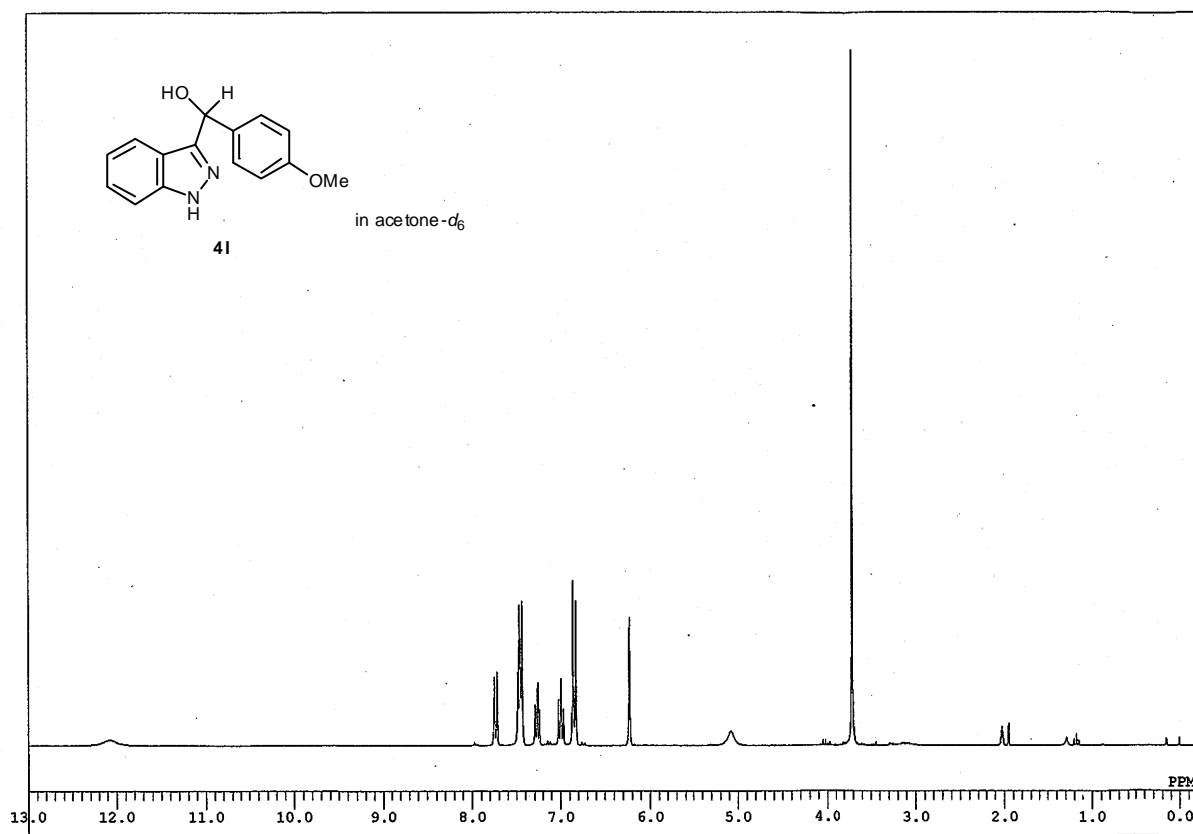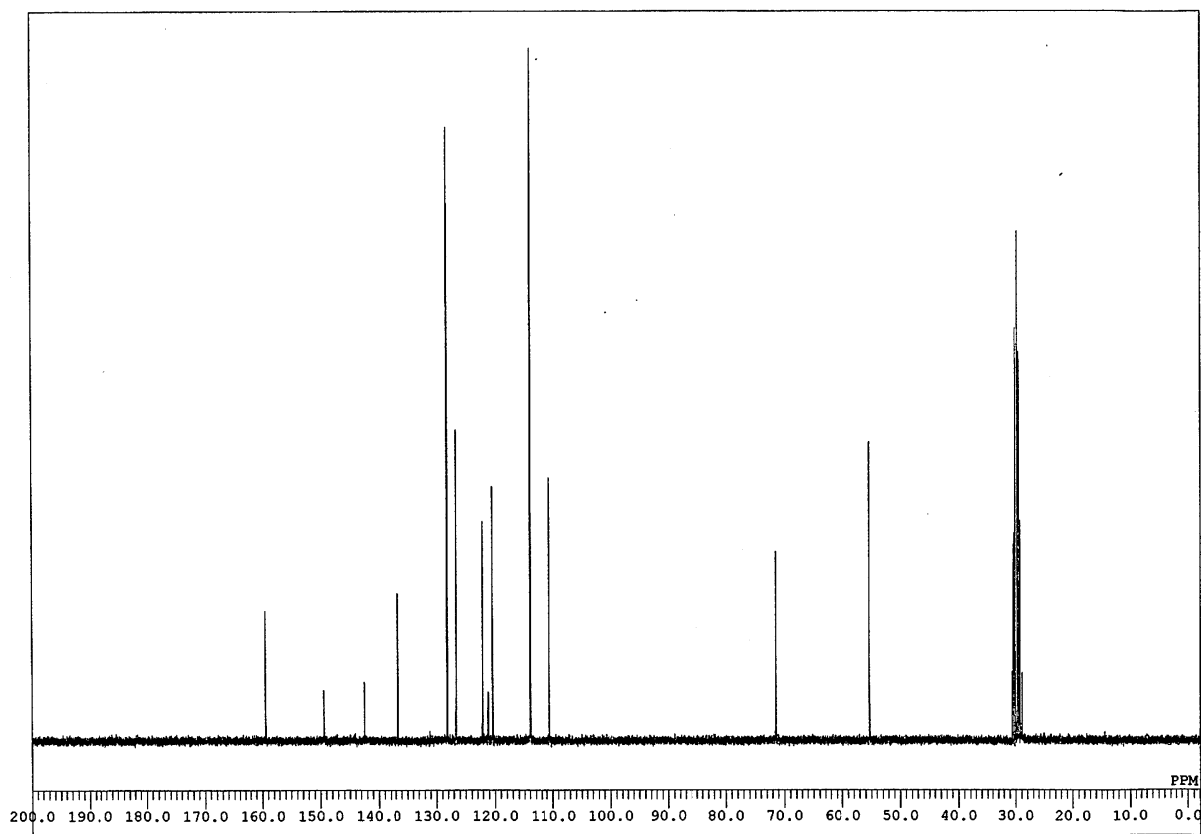

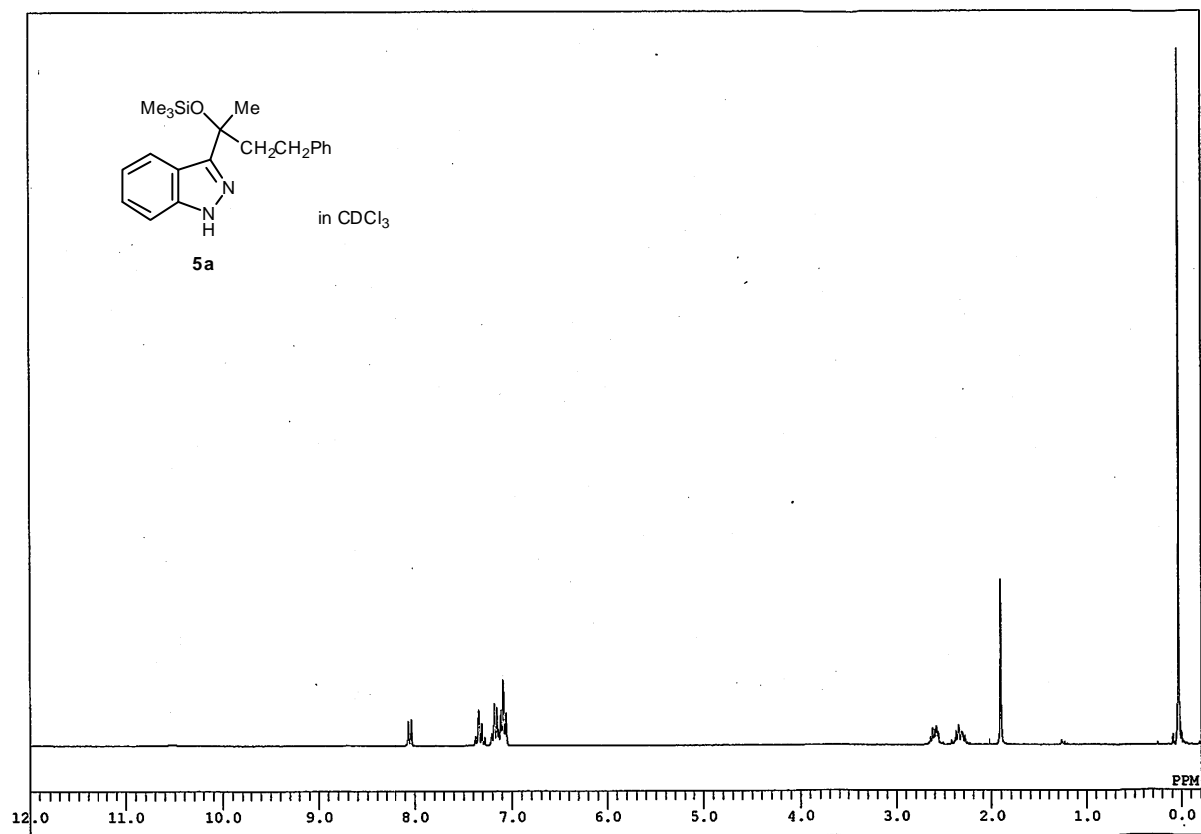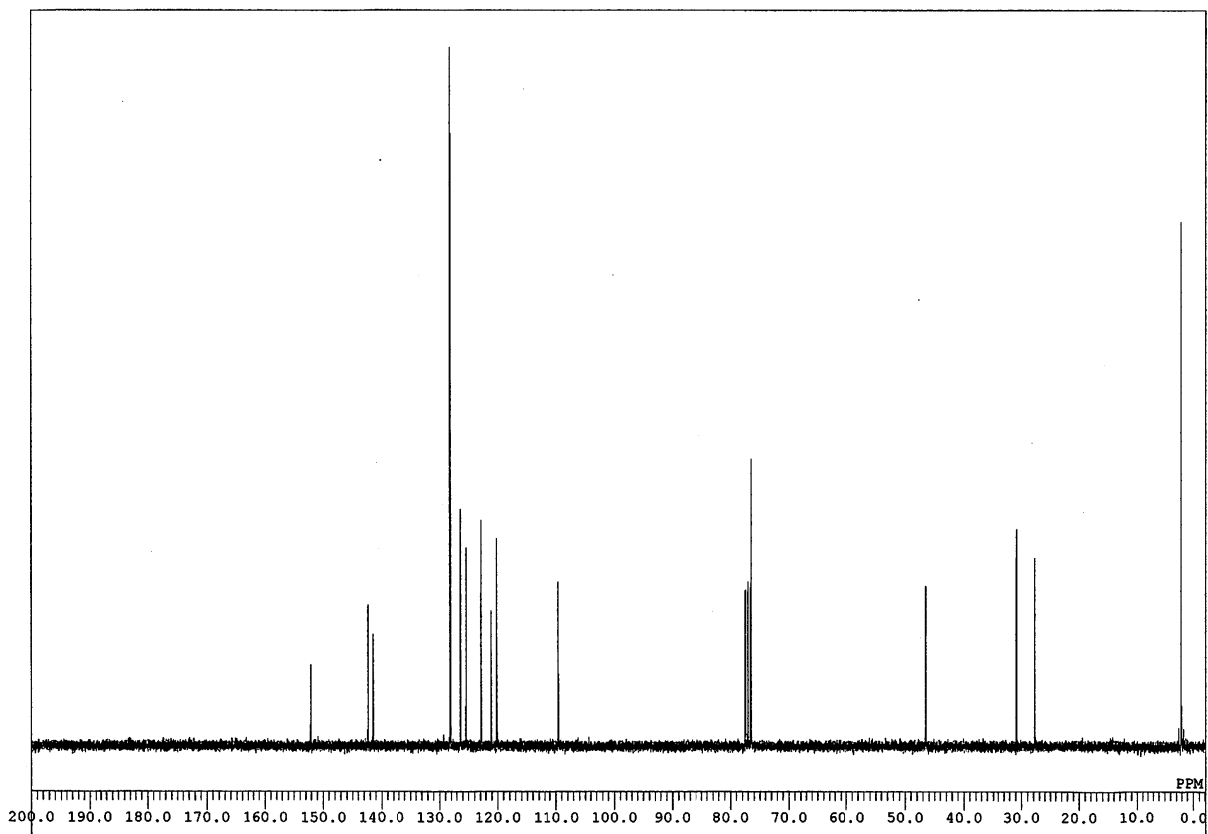

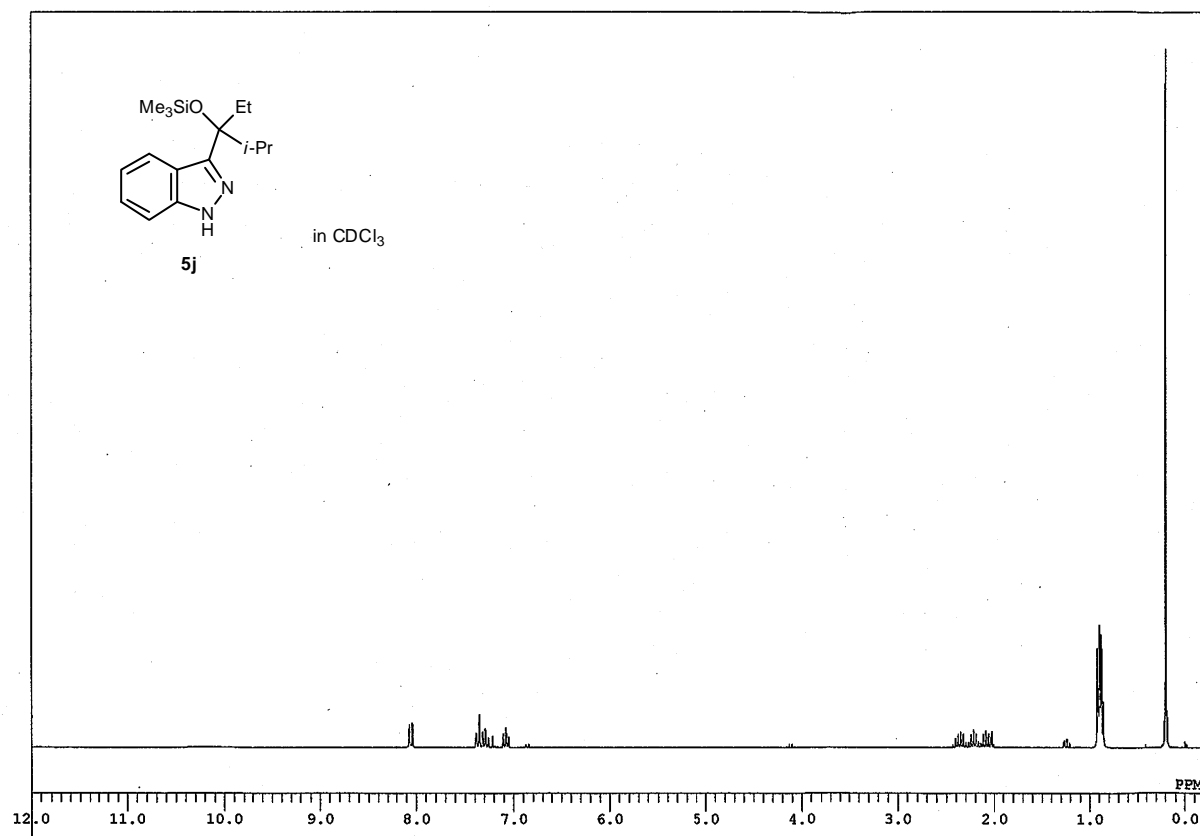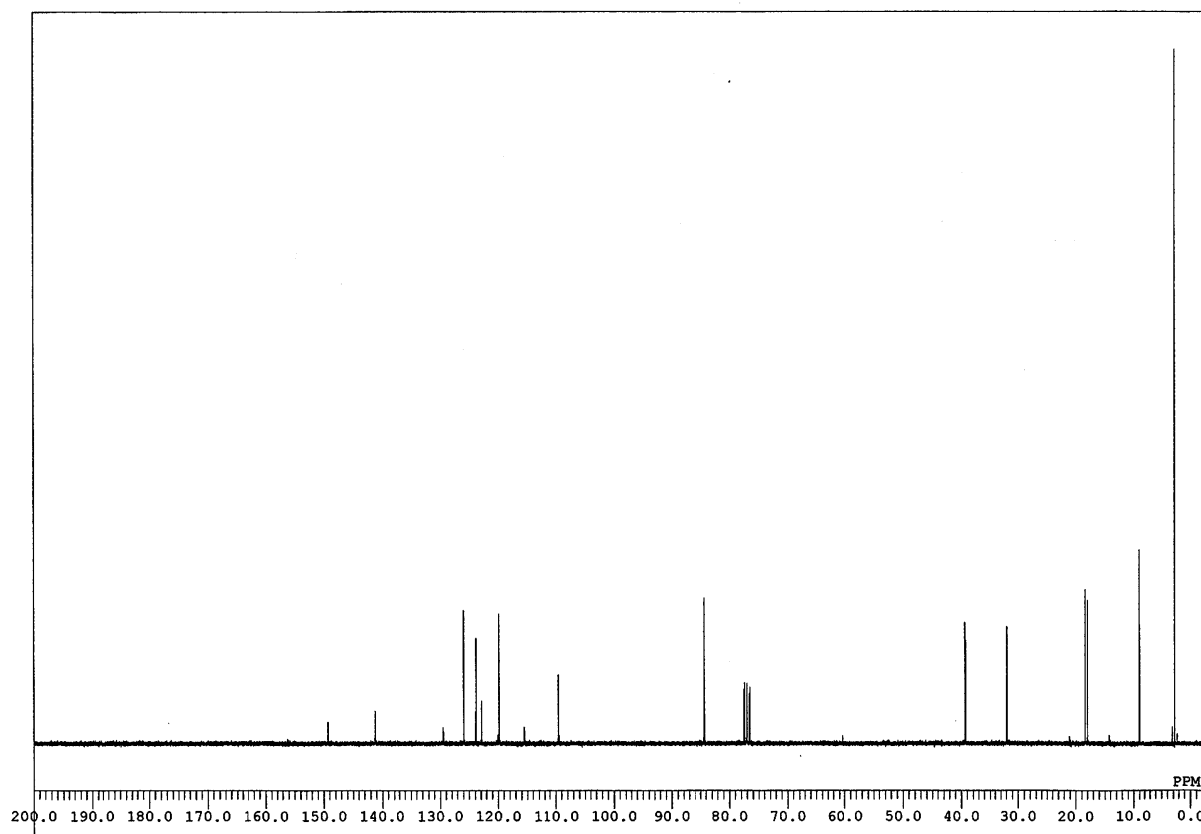

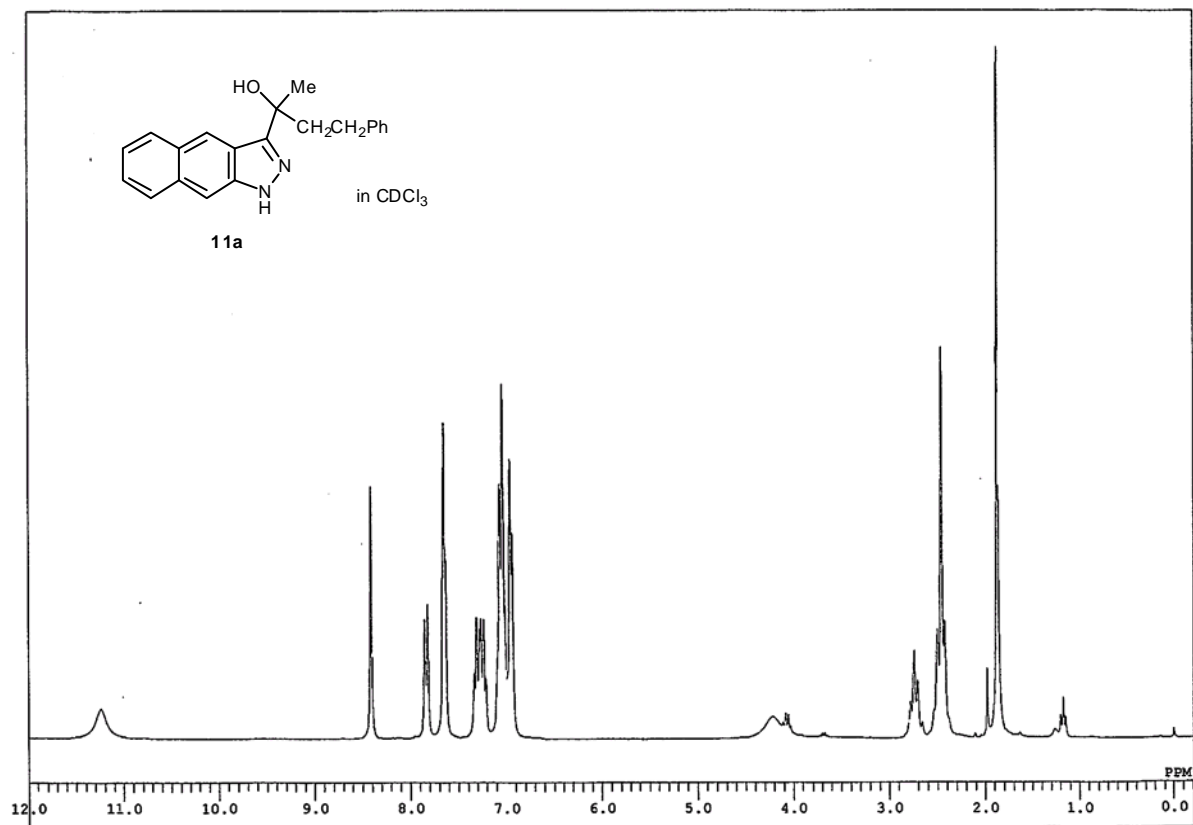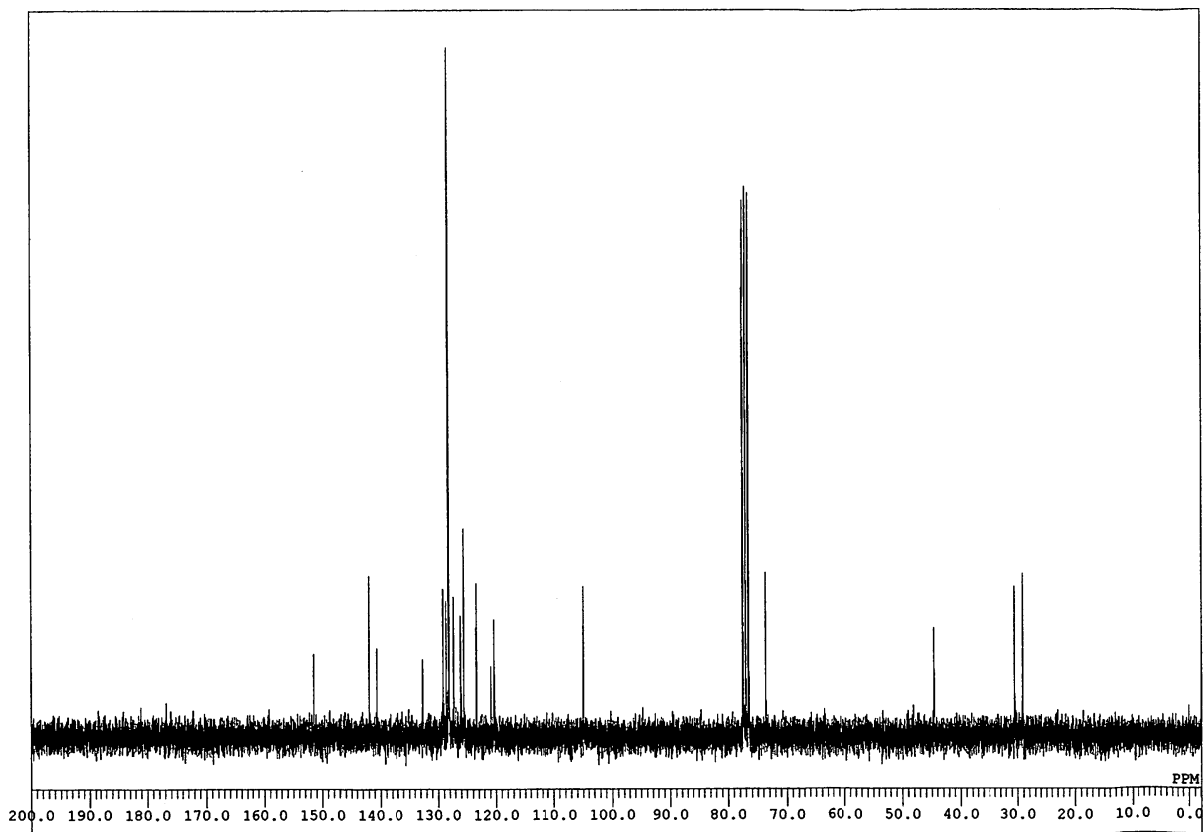

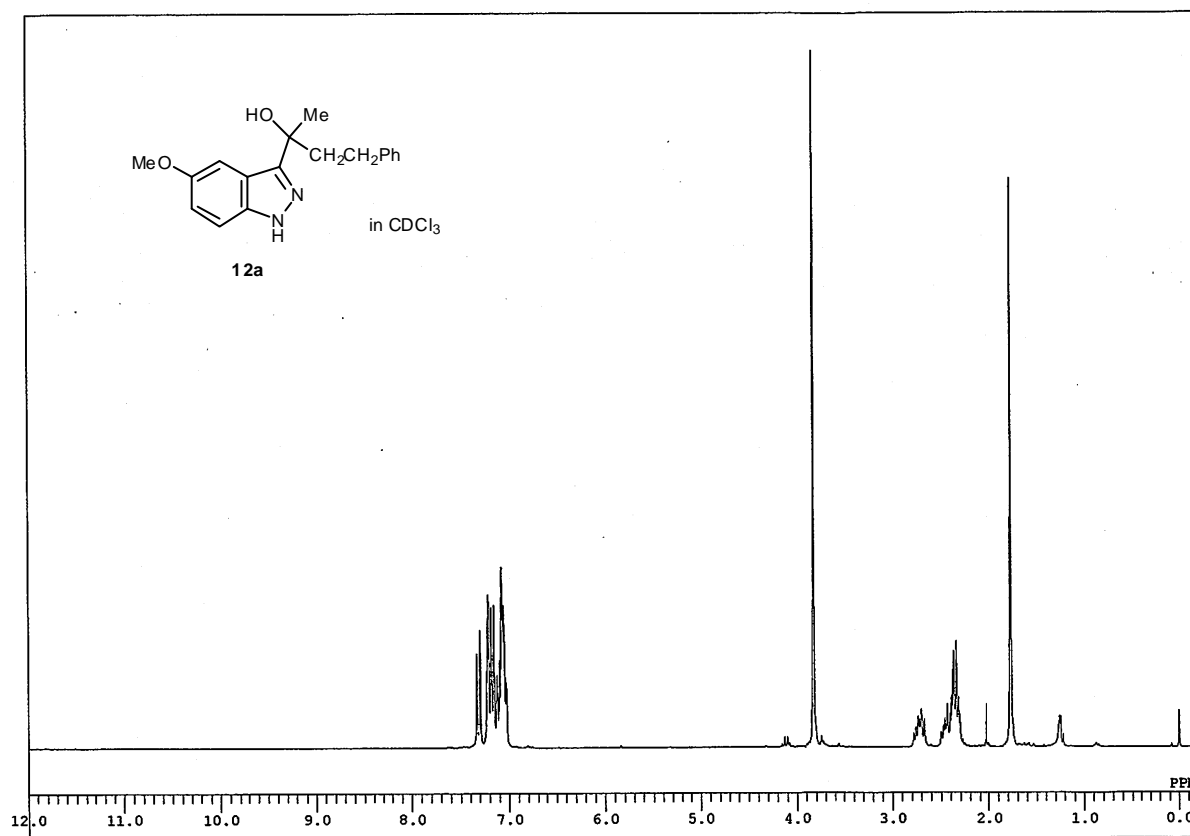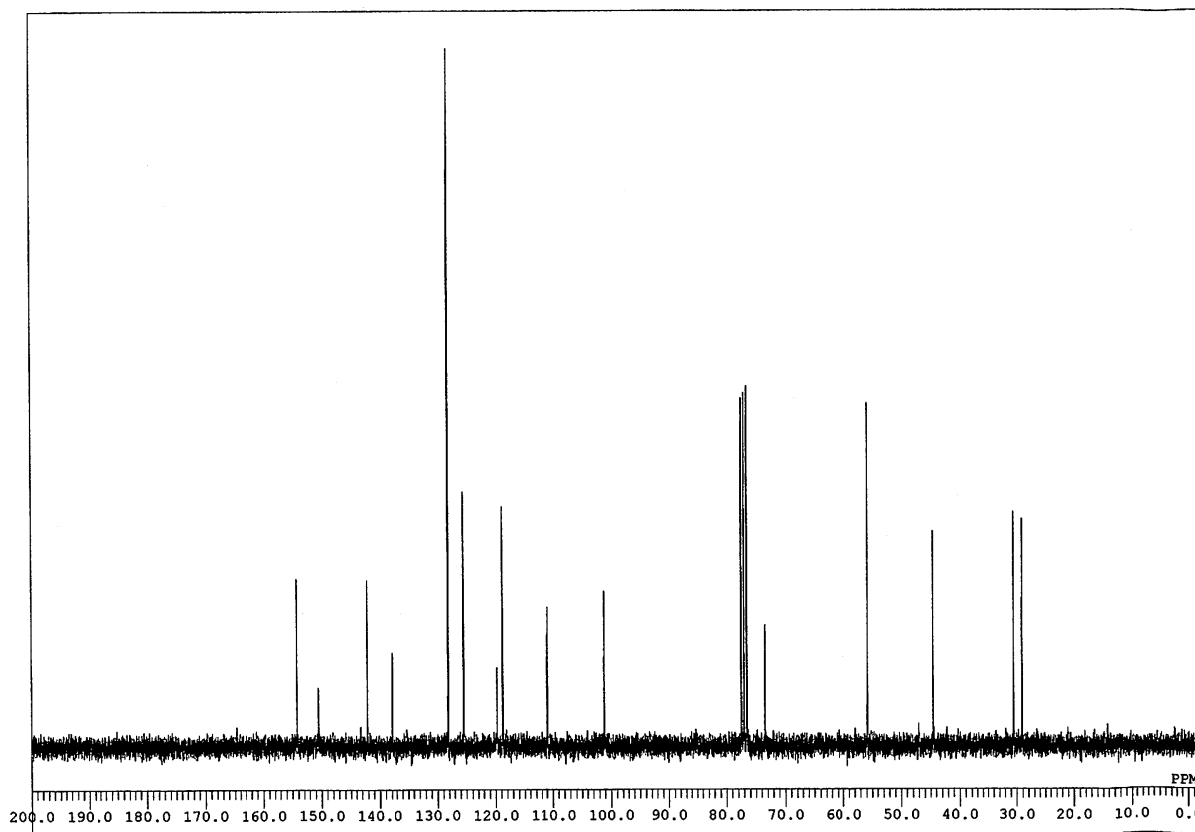



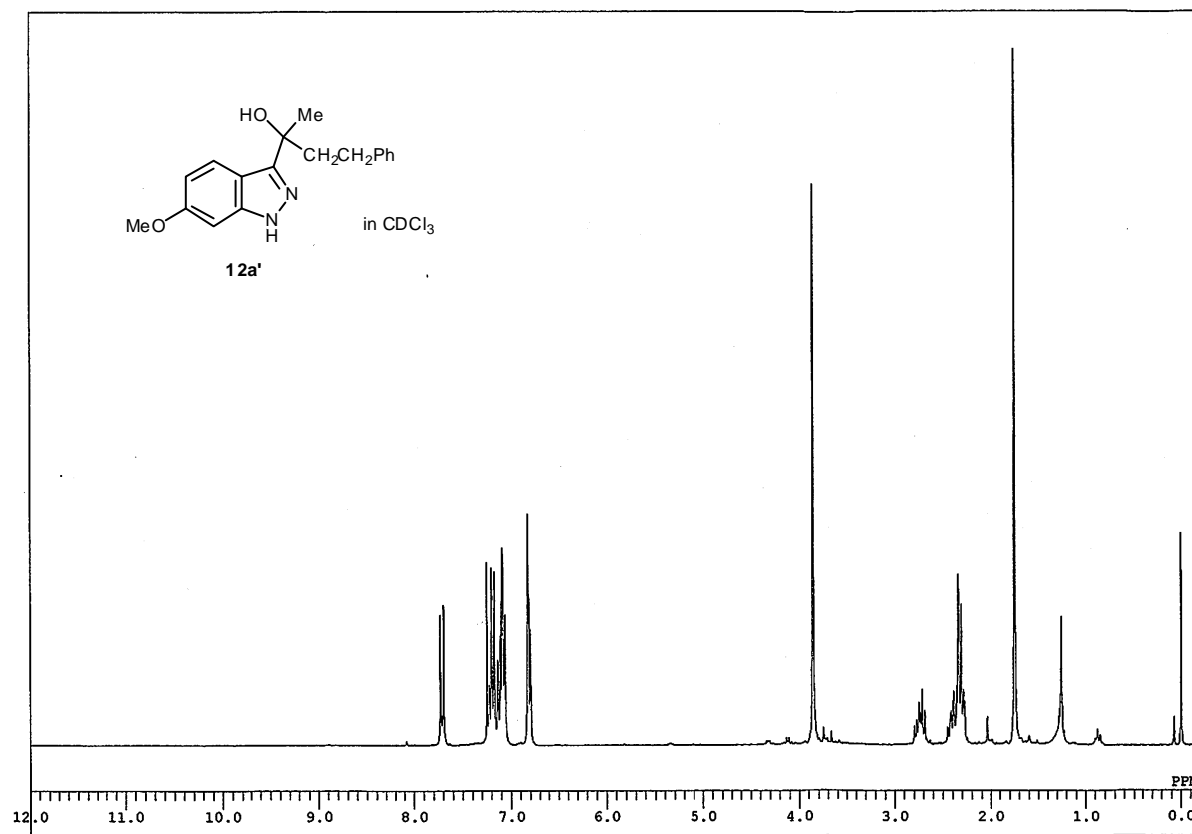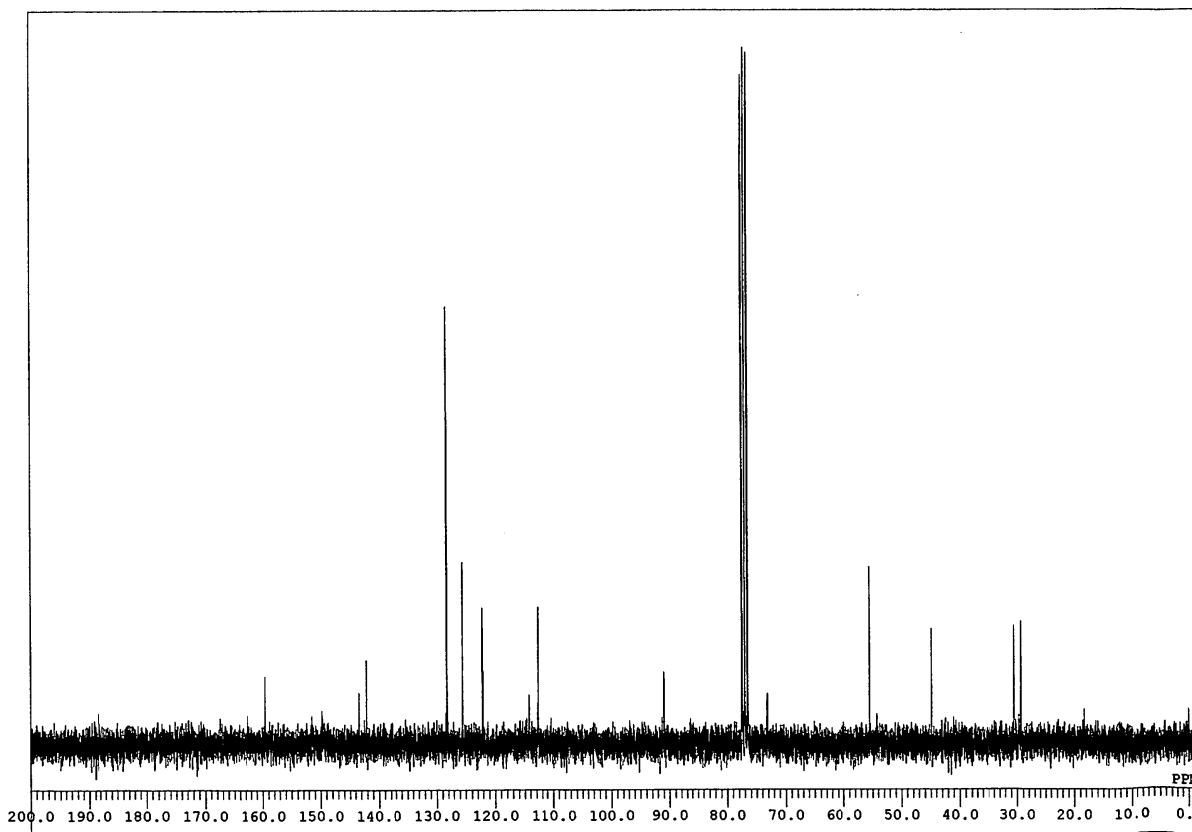

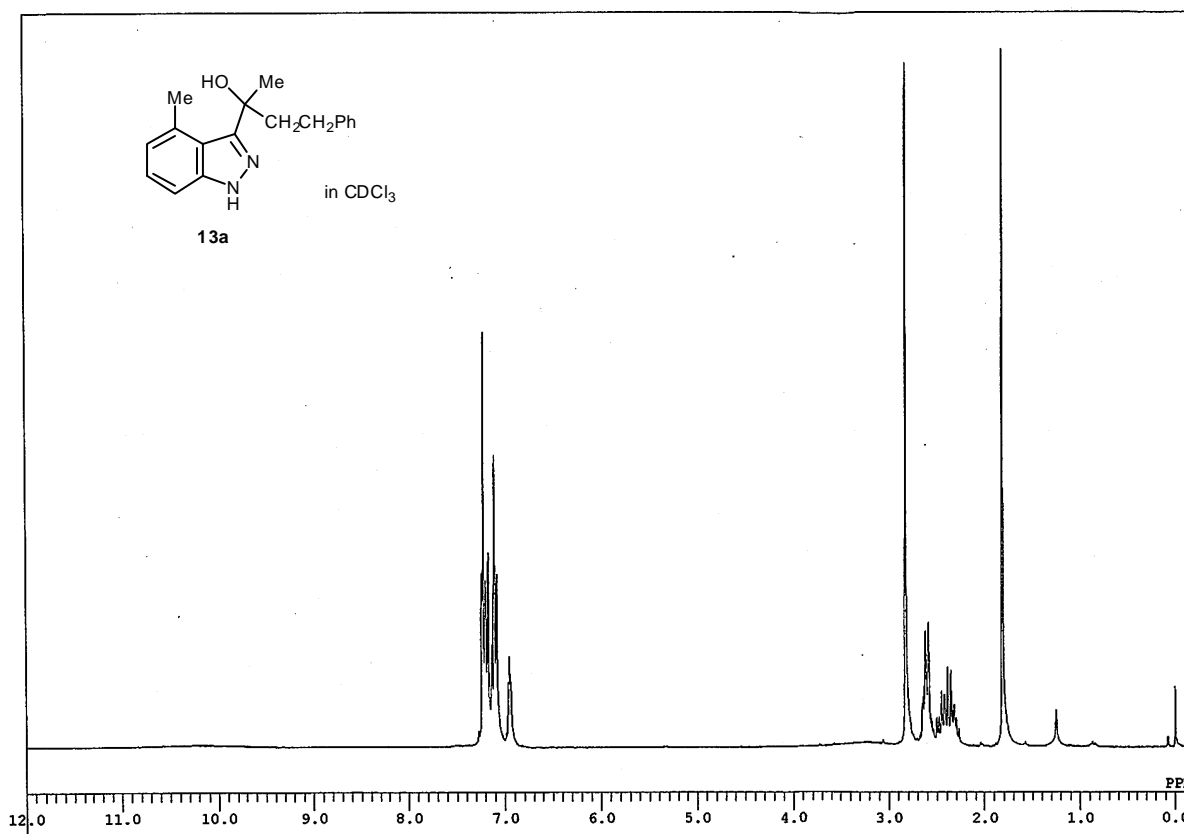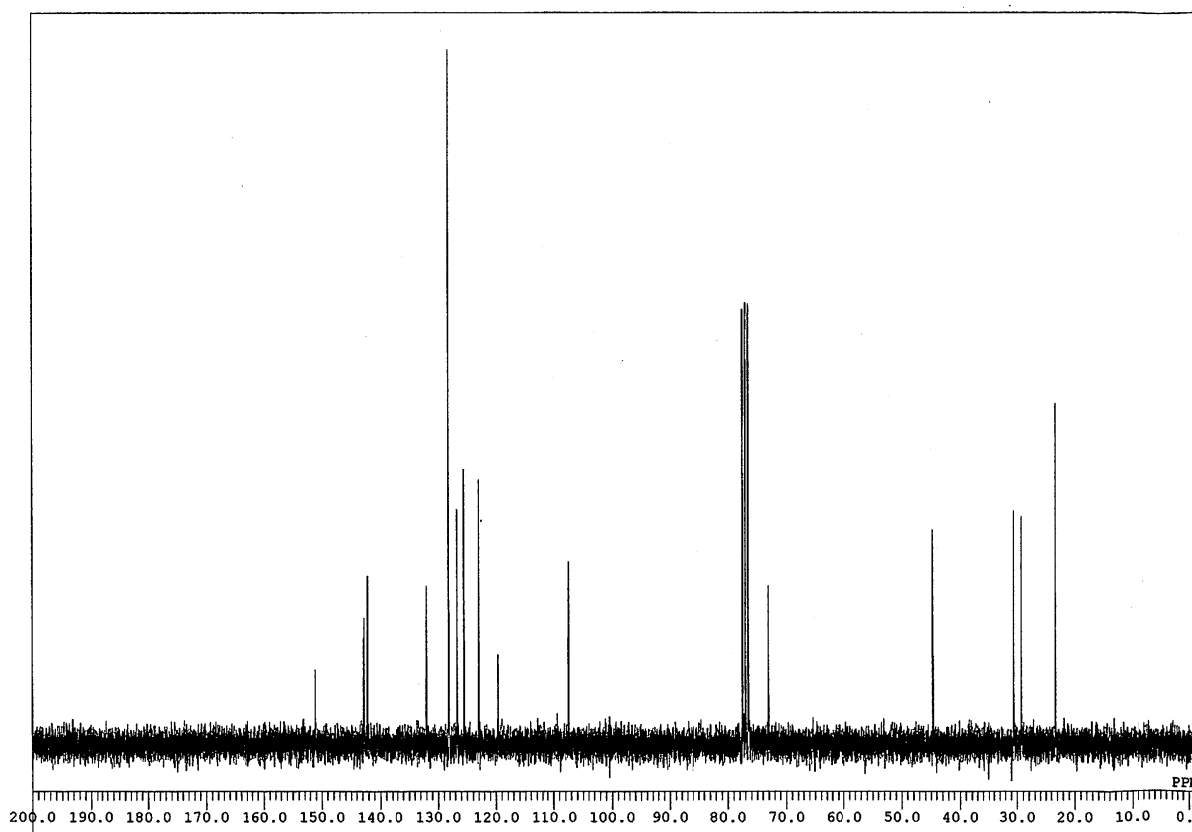

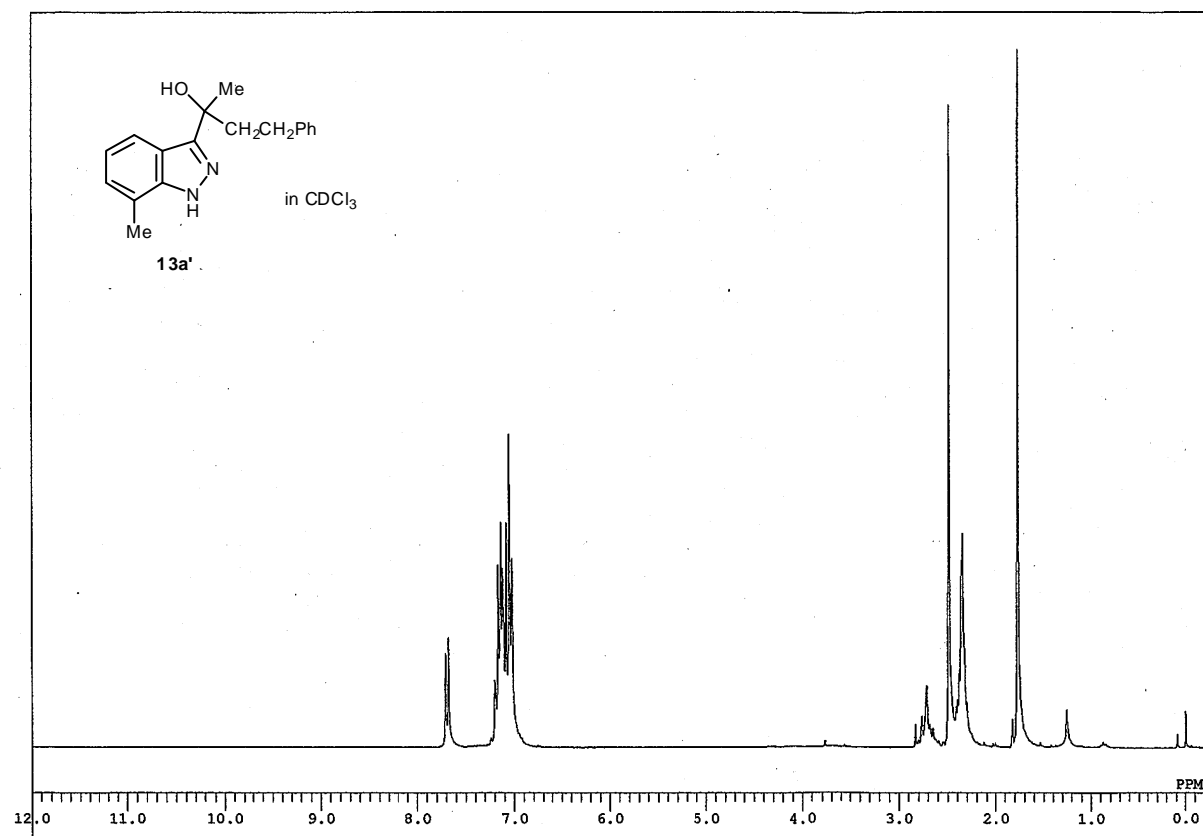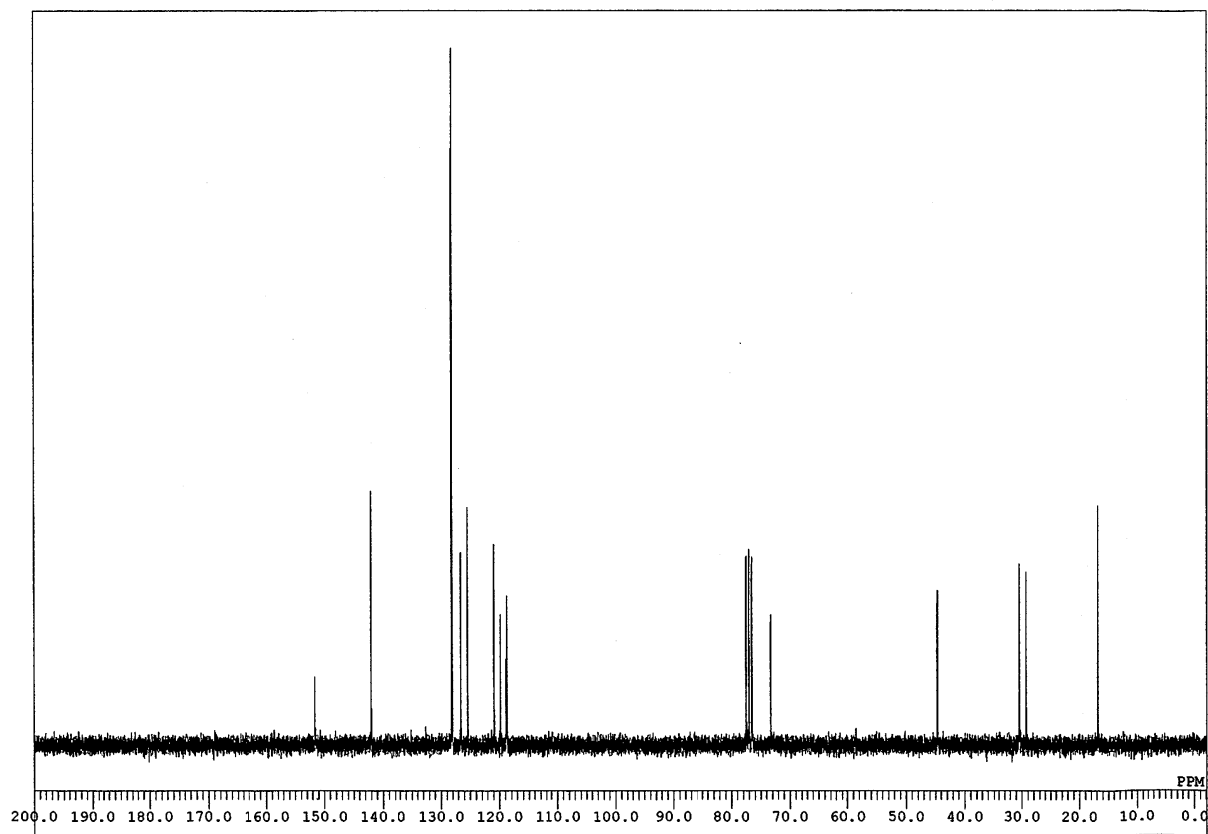

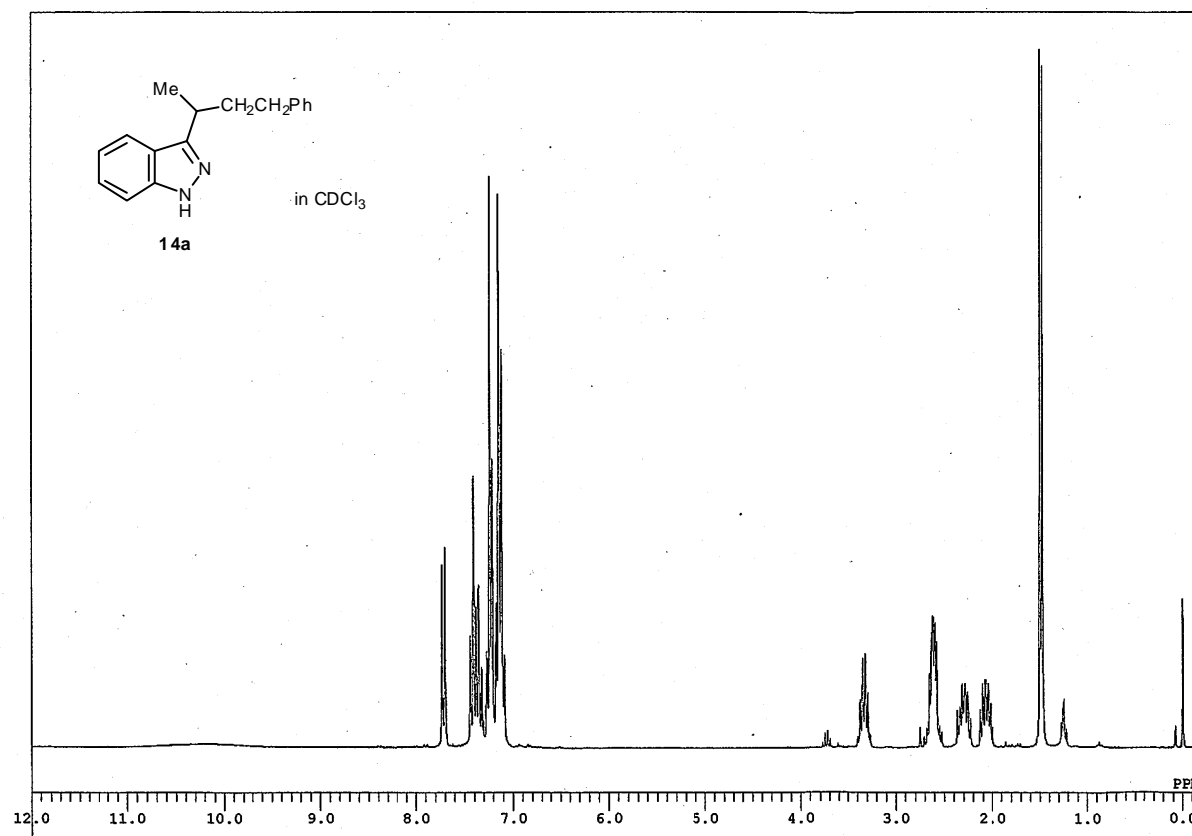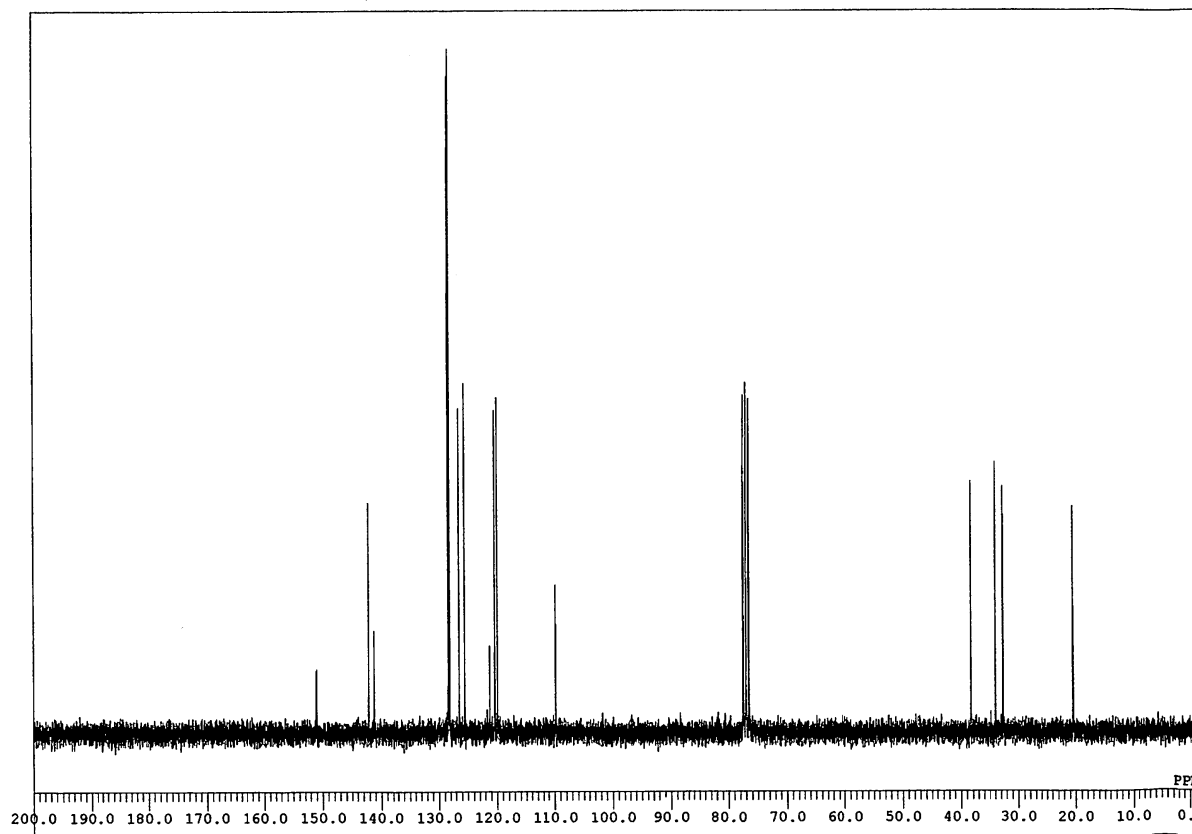

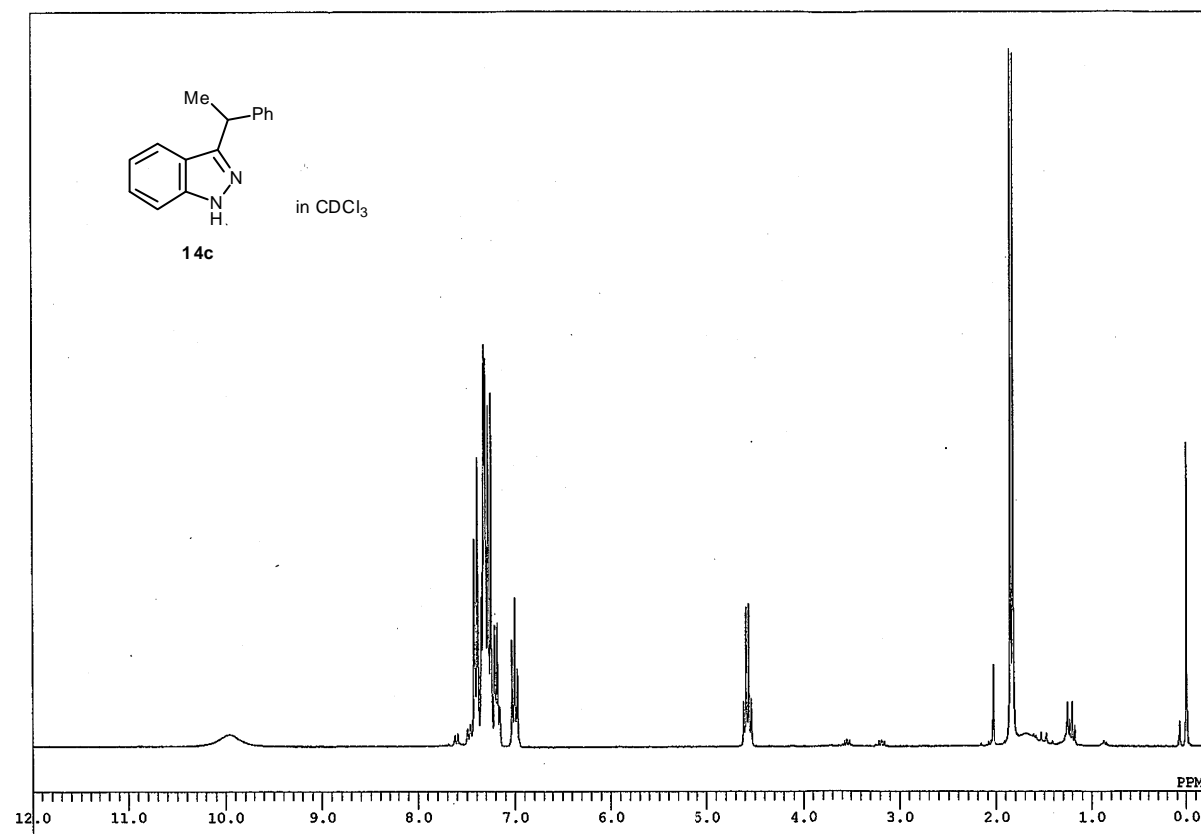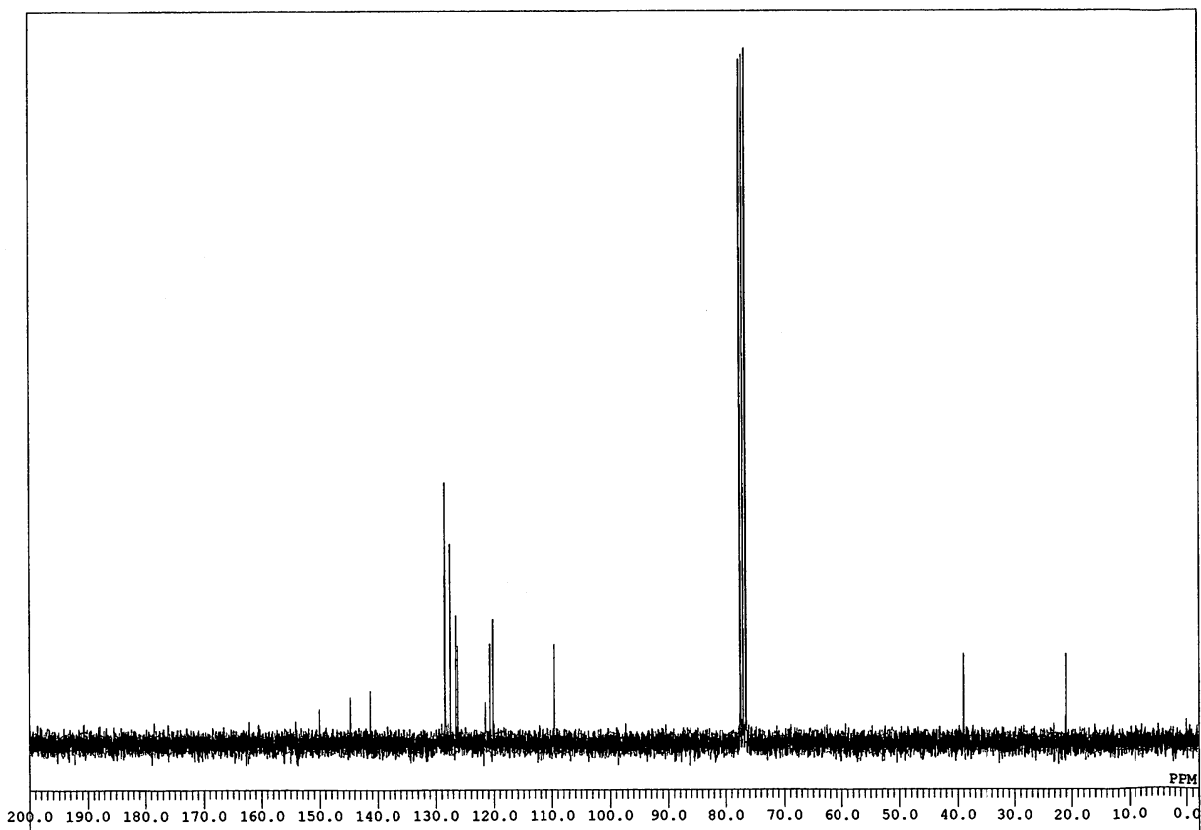

**1-Diazo-2-methyl-4-phenyl-1-(trimethylsilyl)butan-2-ol (2a)**<sup>1)</sup>**2-Diazo-1-(4-methoxyphenyl)-1-phenyl-2-(trimethylsilyl)ethanol (2b)**

Orange oil. <sup>1</sup>H-NMR (CD<sub>2</sub>Cl<sub>2</sub>) δ : 0.17 (s, 9H), 3.01 (br s, 1H), 3.79 (s, 3H), 6.90 (d, 2H, *J* = 8.5 Hz), 7.31-7.43 (m, 5H), 7.50 (d, 2H, *J* = 7.0 Hz). <sup>13</sup>C-NMR (CD<sub>2</sub>Cl<sub>2</sub>) δ : -0.46, 55.23, 80.74, 113.36, 126.70, 127.34, 128.03, 128.17, 137.82, 145.97, 158.90. IR (neat) ν : 3477, 2041 cm<sup>-1</sup>. MS (EI): *m/z* = 298 (M<sup>+</sup>-N<sub>2</sub>, 96.2), 135 (bp). HRMS (EI): calcd for C<sub>18</sub>H<sub>22</sub>O<sub>2</sub>Si (M<sup>+</sup>-N<sub>2</sub>), 298.1389, found, 298.1389.

**2-Diazo-1-phenyl-2-(trimethylsilyl)ethanol (2c)**<sup>1)</sup>**1-Diazo-2-(4-trifluoromethylphenyl)-1-(trimethylsilyl)propan-2-ol (2d)**

Yellow oil. <sup>1</sup>H-NMR (CD<sub>2</sub>Cl<sub>2</sub>) δ : 0.07 (s, 9H), 1.74 (s, 3H), 2.41 (br s, 1H), 7.62 (d, 2H, *J* = 8.5 Hz), 7.65 (d, 2H, *J* = 8.5 Hz). <sup>13</sup>C-NMR (CD<sub>2</sub>Cl<sub>2</sub>) δ : -0.62, 31.26, 44.44, 75.88, 124.38 (q, <sup>1</sup>*J*<sub>C-F</sub> = 271 Hz), 125.04 (q, <sup>3</sup>*J*<sub>C-F</sub> = 4 Hz), 125.95, 128.68, 129.03 (q, <sup>2</sup>*J*<sub>C-F</sub> = 32 Hz), 151.44 (q, <sup>4</sup>*J*<sub>C-F</sub> = 1 Hz). IR (neat) ν : 3443, 2044 cm<sup>-1</sup>. MS (EI): *m/z* = 274 (M<sup>+</sup>-N<sub>2</sub>, 7.5), 75 (bp). HRMS (EI): calcd for C<sub>13</sub>H<sub>17</sub>F<sub>3</sub>OSi (M<sup>+</sup>-N<sub>2</sub>), 274.1001, found, 274.1003.

**1-Diazo-2-(pyridin-2-yl)-1-(trimethylsilyl)propan-2-ol (2e)**

Orange solid. <sup>1</sup>H-NMR (CD<sub>2</sub>Cl<sub>2</sub>) δ : 0.02 (s, 9H), 1.67 (s, 3H), 5.68 (br s, 1H), 7.22 (dd, 1H, *J* = 5.0, 7.5 Hz), 7.43 (d, 1H, *J* = 8.0 Hz), 7.73 (dd, 1H, *J* = 7.5, 8.0 Hz), 8.47 (d, 1H, *J* = 5.0 Hz). <sup>13</sup>C-NMR (CD<sub>2</sub>Cl<sub>2</sub>) δ : -0.77, 28.89, 73.84, 119.97, 122.38, 137.22, 146.89, 164.05. IR (neat) ν : 3373, 2039 cm<sup>-1</sup>. MS (EI): *m/z* = 207 (M<sup>+</sup>-N<sub>2</sub>, 29.6), 192 (bp). HRMS (EI): calcd for C<sub>11</sub>H<sub>17</sub>NOSi (M<sup>+</sup>-N<sub>2</sub>), 207.1080, found, 207.1086.

**1-Diazo-2-(thiophen-2-yl)-1-(trimethylsilyl)propan-2-ol (2f)**

Yellow oil. <sup>1</sup>H-NMR (CD<sub>2</sub>Cl<sub>2</sub>) δ : 0.16 (s, 9H), 1.82 (s, 3H), 2.74 (br s, 1H), 6.93-6.99 (m, 2H), 7.23 (d, 1H, *J* = 5.0 Hz). <sup>13</sup>C-NMR (CD<sub>2</sub>Cl<sub>2</sub>) δ : -0.53, 31.49, 45.22, 74.27, 123.25, 124.38, 126.57, 152.37. IR (neat) ν : 3435, 2042 cm<sup>-1</sup>. MS (EI): *m/z* = 240 (M<sup>+</sup>, 2.6), 212 (M<sup>+</sup>-N<sub>2</sub>, 14.6), 75 (bp). HRMS (EI): calcd for C<sub>10</sub>H<sub>16</sub>N<sub>2</sub>OSSi (M<sup>+</sup>), 240.0753, found, 240.0741.

**1-Diazo-4,4-dimethoxy-2-methyl-1-(trimethylsilyl)butan-2-ol (2g)**

Yellow oil. <sup>1</sup>H-NMR (CD<sub>2</sub>Cl<sub>2</sub>) δ : 0.18 (s, 9H), 1.35 (s, 3H), 1.90 (d, 2H, *J* = 6.0 Hz), 3.30 (s, 1H), 3.36 (s, 1H), 4.01 (br s, 1H), 4.61 (t, 1H, *J* = 6.0 Hz). <sup>13</sup>C-NMR (CD<sub>2</sub>Cl<sub>2</sub>) δ : -0.33, 29.61, 42.66, 52.69, 53.80, 70.78, 103.21. IR (neat) ν : 3481, 2033 cm<sup>-1</sup>. MS (EI): *m/z* = 246 (M<sup>+</sup>, 3.4), 218 (M<sup>+</sup>-N<sub>2</sub>, 2.9), 75 (bp). HRMS (EI): calcd for C<sub>10</sub>H<sub>22</sub>N<sub>2</sub>O<sub>3</sub>Si (M<sup>+</sup>), 246.1400, found, 246.1414.

**Methyl 4-diazo-3-hydroxy-3-methyl-4-(trimethylsilyl)butanoate (2h)**

Yellow oil. <sup>1</sup>H-NMR (CD<sub>2</sub>Cl<sub>2</sub>) δ : 0.18 (s, 9H), 1.41 (s, 3H), 2.60, 2.69 (AB, 2H, *J* = 16.0 Hz), 3.68 (s, 3H), 4.08 (br s, 1H). <sup>13</sup>C-NMR (CD<sub>2</sub>Cl<sub>2</sub>) δ : -0.43, 28.69, 44.92, 51.89, 71.22, 172.58. IR (neat) ν : 3481, 2039, 1717 cm<sup>-1</sup>. MS (EI): *m/z* = 202 (M<sup>+</sup>-N<sub>2</sub>, 2.1), 187 (M<sup>+</sup>-N<sub>2</sub>-Me, 18.5), 73 (bp). HRMS (EI): calcd for C<sub>9</sub>H<sub>18</sub>O<sub>3</sub>Si (M<sup>+</sup>-N<sub>2</sub>), 202.0988, found, 202.1025.

**(E)-2-[(Trimethylsilyl)diazomethyl]-4-phenylbut-3-en-2-ol (2i)**

Yellow oil. <sup>1</sup>H-NMR (CD<sub>2</sub>Cl<sub>2</sub>) δ : 0.22 (s, 9H), 1.60 (s, 3H), 2.23 (br s, 1H), 6.32 (d, 1H, *J* = 16.0 Hz), 6.66 (d, 1H, *J* = 16.0 Hz), 7.24-7.42 (m, 5H). IR (neat) ν : 3412, 2041 cm<sup>-1</sup>. MS (EI): *m/z* = 232 (M<sup>+</sup>-N<sub>2</sub>, 53.1), 73 (bp). HRMS (EI): calcd for C<sub>14</sub>H<sub>20</sub>OSi (M<sup>+</sup>-N<sub>2</sub>), 232.1284, found, 232.1265.

**3-Diazo(trimethylsilyl)methyl-2-methylpentan-3-ol (2j)**

Yellow oil. <sup>1</sup>H-NMR (CD<sub>2</sub>Cl<sub>2</sub>) δ : 0.19 (s, 9H), 0.91-0.98 (m, 9H), 1.48 (br s, 1H), 1.66 (q, 2H, *J* = 7.5 Hz), 1.87 (sept, 1H, *J* = 7.0 Hz). <sup>13</sup>C-NMR (CD<sub>2</sub>Cl<sub>2</sub>) δ : -0.16, 8.21, 16.69, 17.68, 30.79, 37.18, 78.26. IR (neat) ν : 3560, 2035 cm<sup>-1</sup>. MS (EI): *m/z* = 186 (M<sup>+</sup>-N<sub>2</sub>, 4.3), 171 (bp). HRMS(EI): calcd for C<sub>10</sub>H<sub>22</sub>OSi (M<sup>+</sup>-N<sub>2</sub>), 186.1440, found, 186.1465.

**1-Diazo-3-methyl-1-(trimethylsilyl)butan-2-ol (2k)**

Yellow oil.  $^1\text{H-NMR}$  ( $\text{CD}_2\text{Cl}_2$ )  $\delta$  : 0.17 (s, 9H), 0.91 (d, 3H,  $J = 6.8$  Hz), 1.01 (d, 3H,  $J = 6.8$  Hz), 1.73-1.86 (m, 1H), 1.92 (br s, 1H), 3.62 (d, 1H,  $J = 8.1$  Hz).  $^{13}\text{C-NMR}$  ( $\text{CD}_2\text{Cl}_2$ )  $\delta$  : -1.43, 18.94, 19.35, 34.01, 75.93. IR (neat)  $\nu$  : 3385, 2042  $\text{cm}^{-1}$ . MS (EI):  $m/z = 158$  ( $\text{M}^+ - \text{N}_2$ , 2.3), 73 (bp). HRMS (EI): calcd for  $\text{C}_8\text{H}_{18}\text{OSi}$  ( $\text{M}^+ - \text{N}_2$ ), 158.1127, found, 158.1105.

**2-Diazo-1-(4-methoxyphenyl)-2-(trimethylsilyl)ethanol (2l)<sup>1)</sup>**

**References**

- 1) Hari, Y.; Tsuchida, S.; Sone, R.; Aoyama, T. *Synthesis* **2007**, 3371-3375.

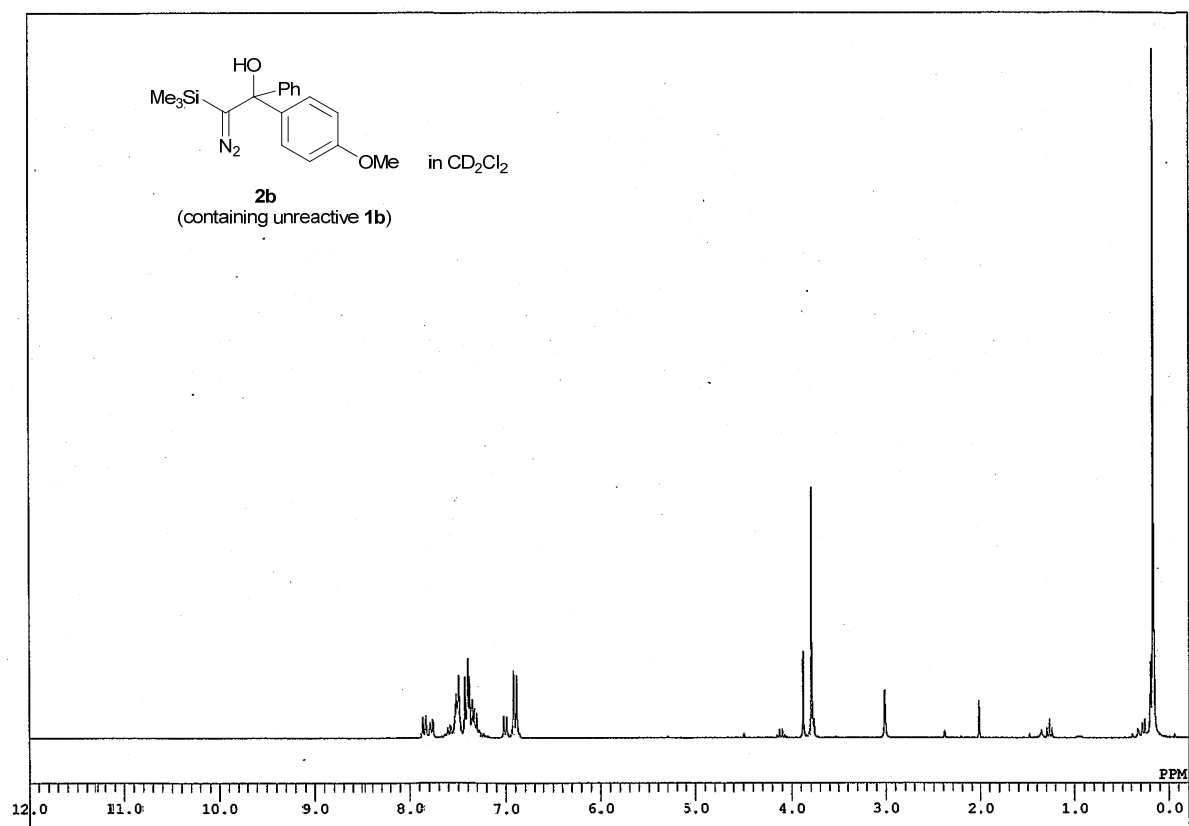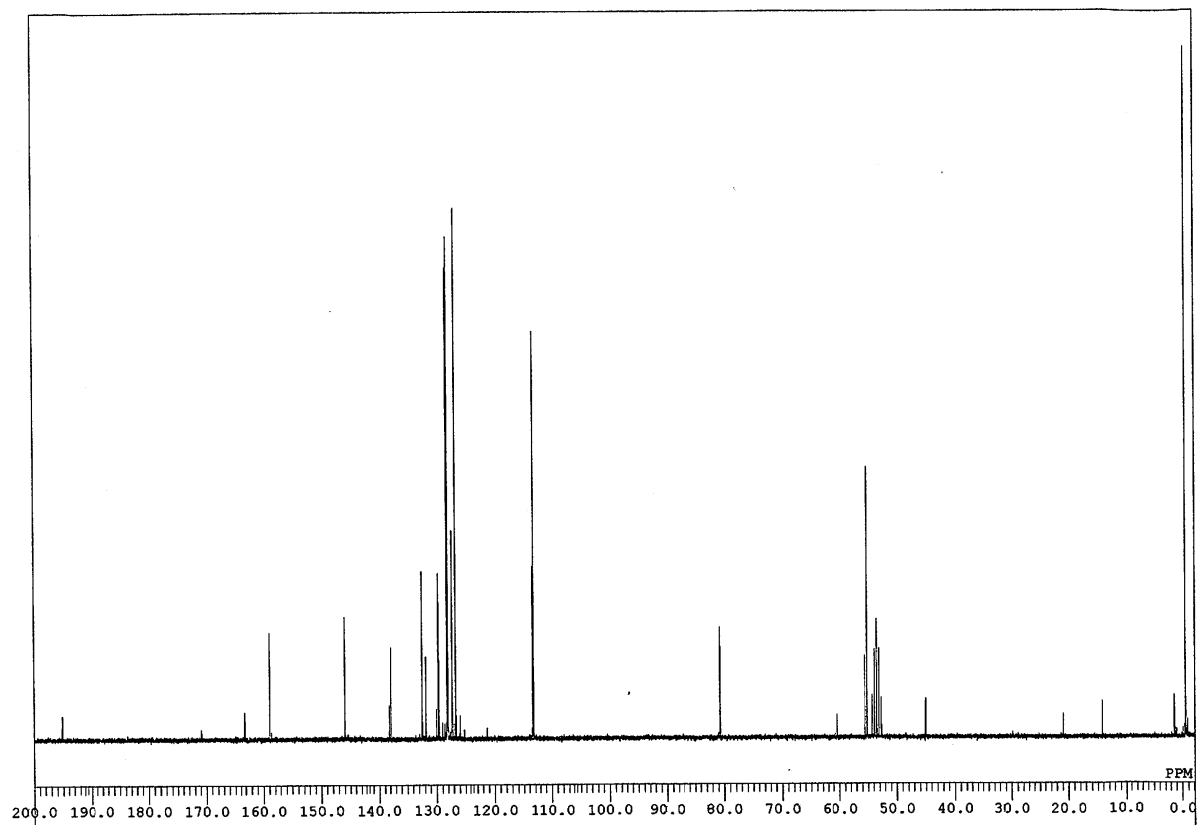



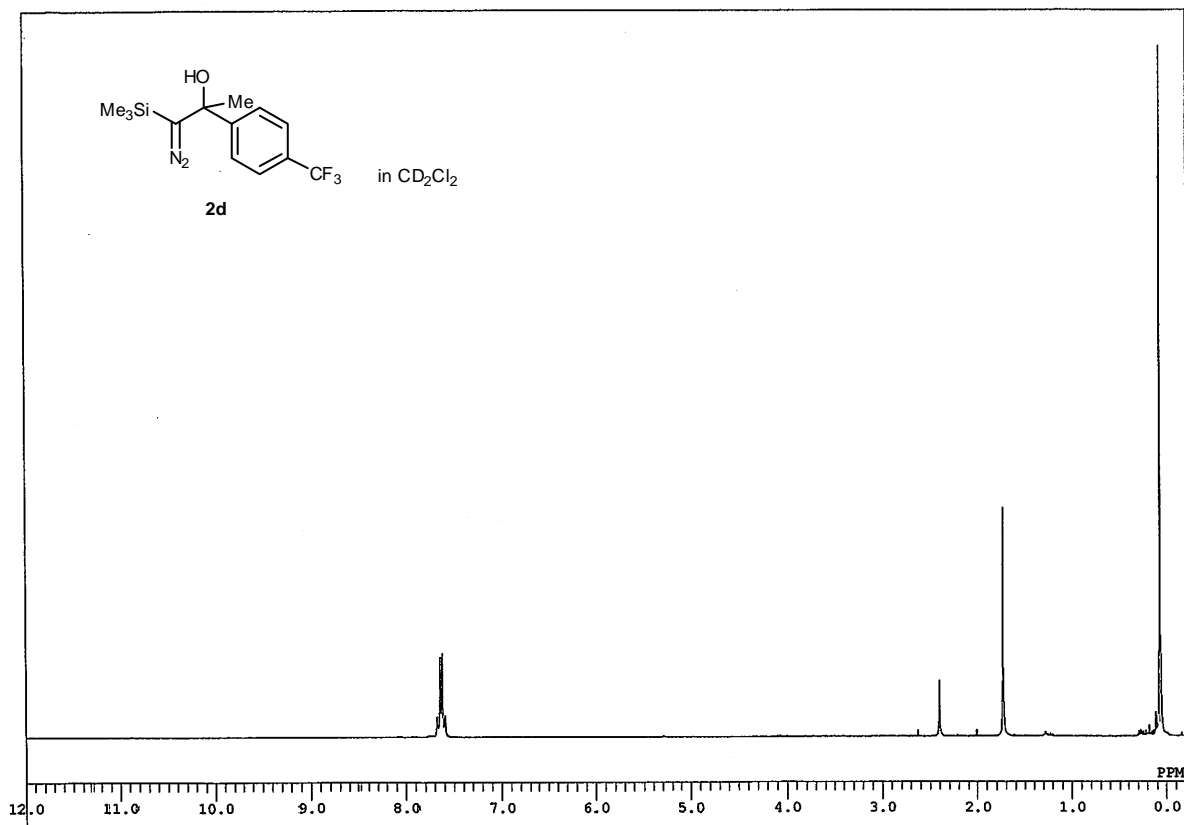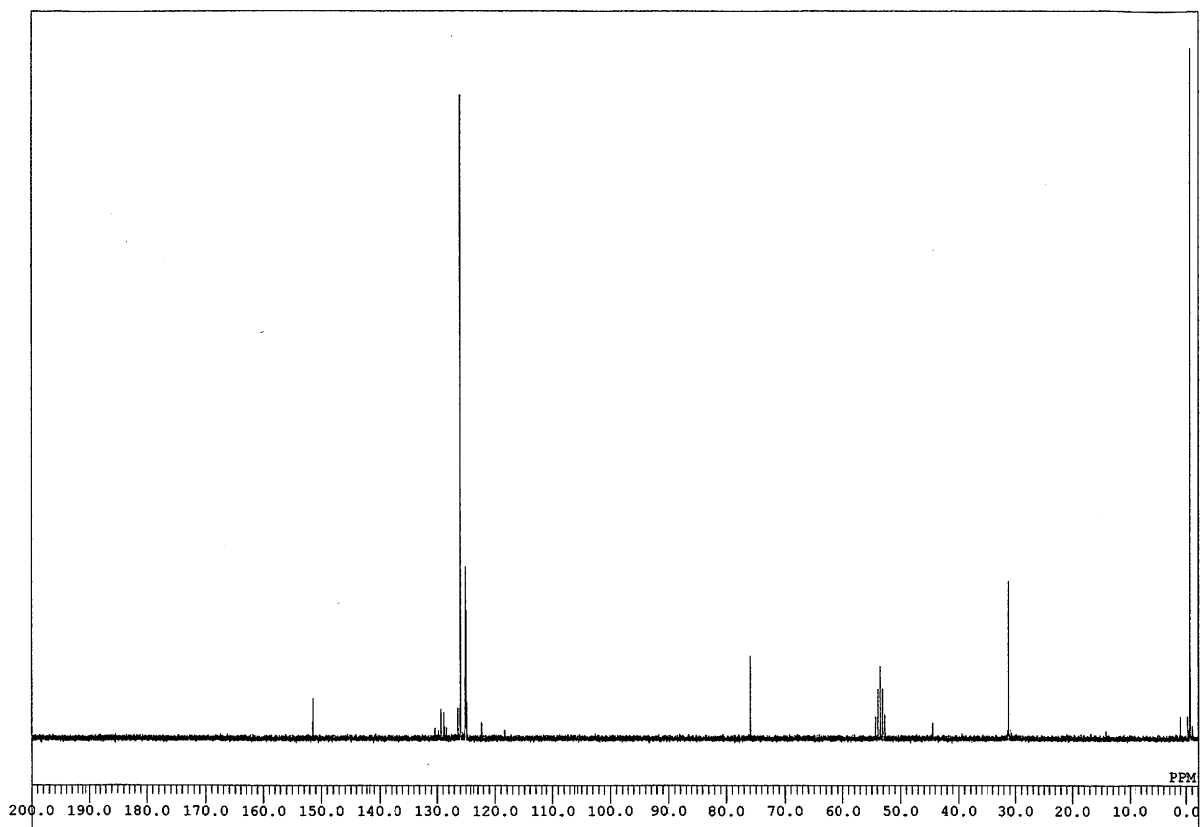

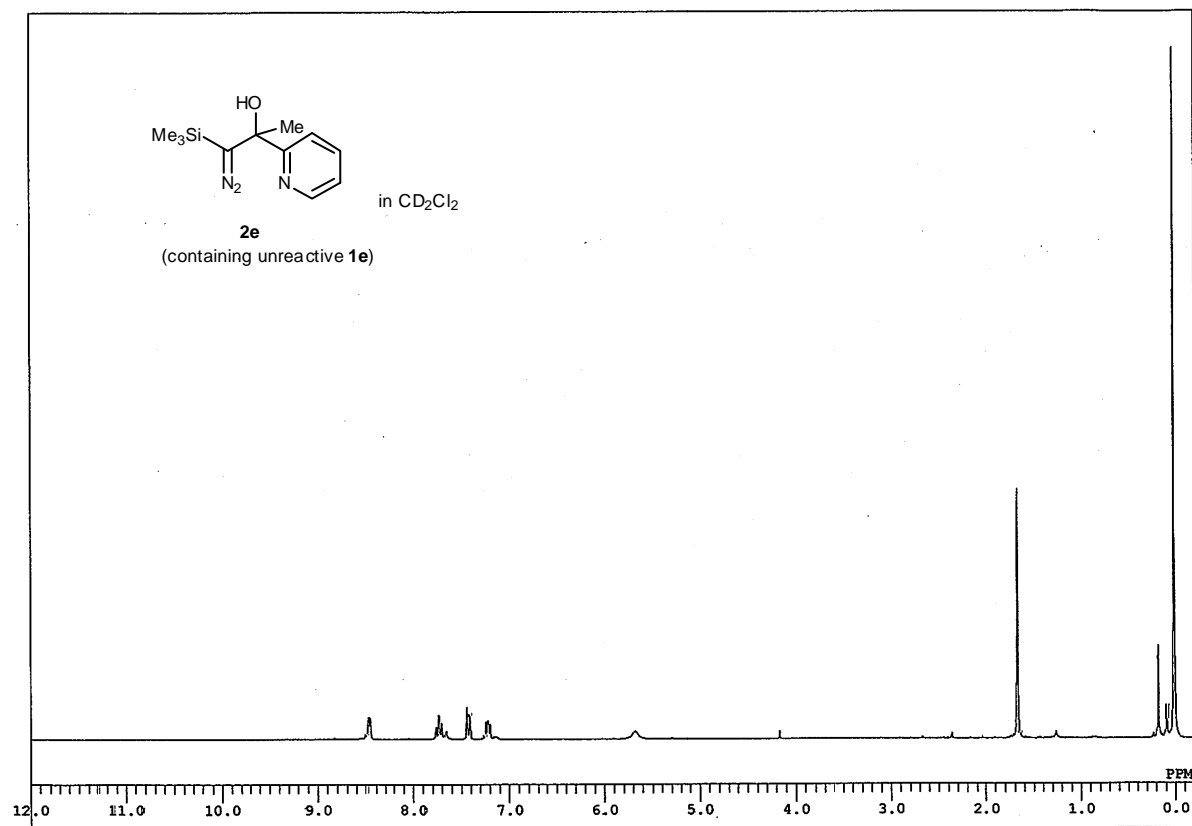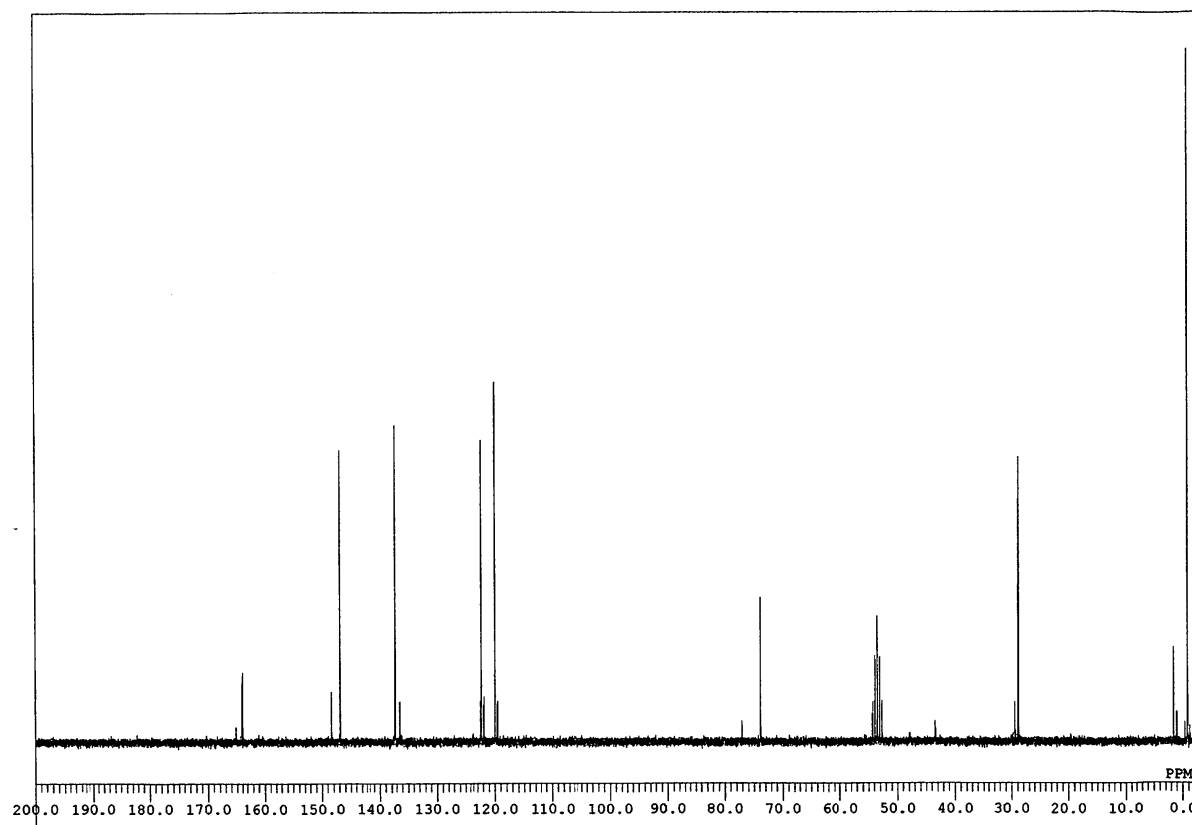

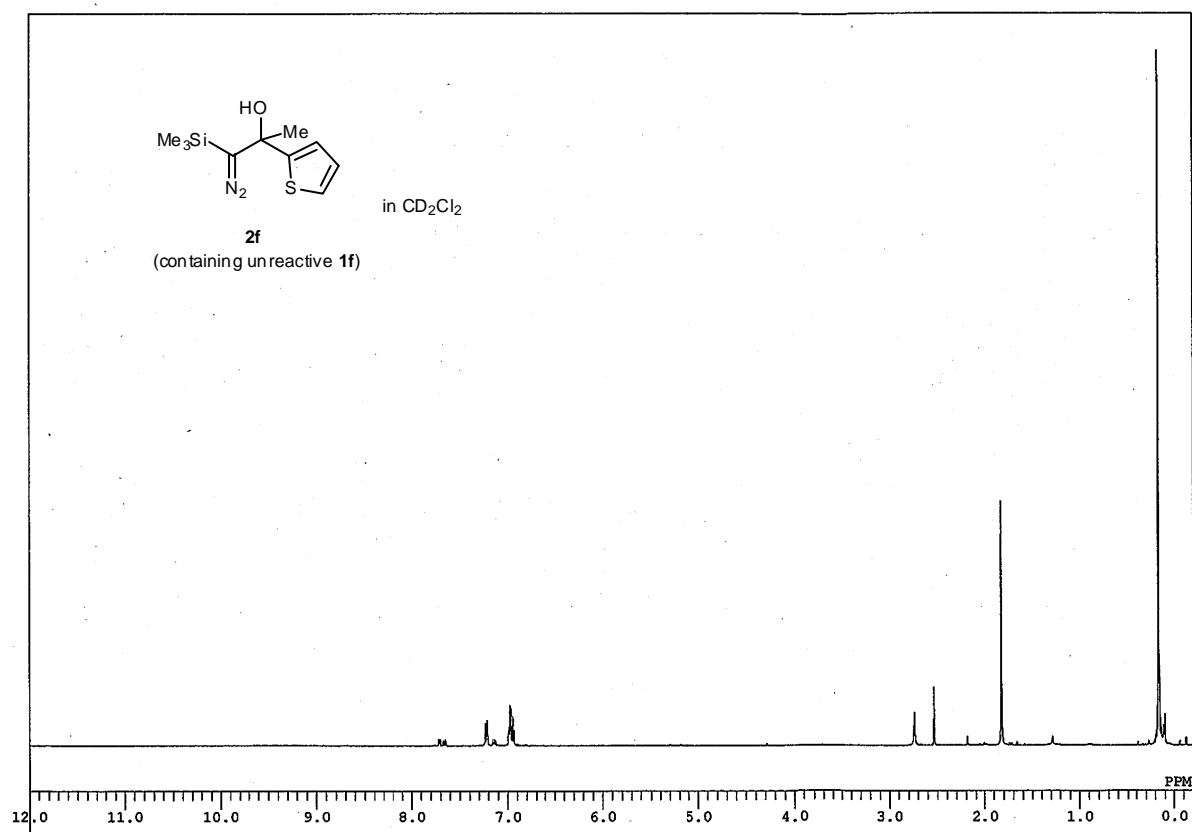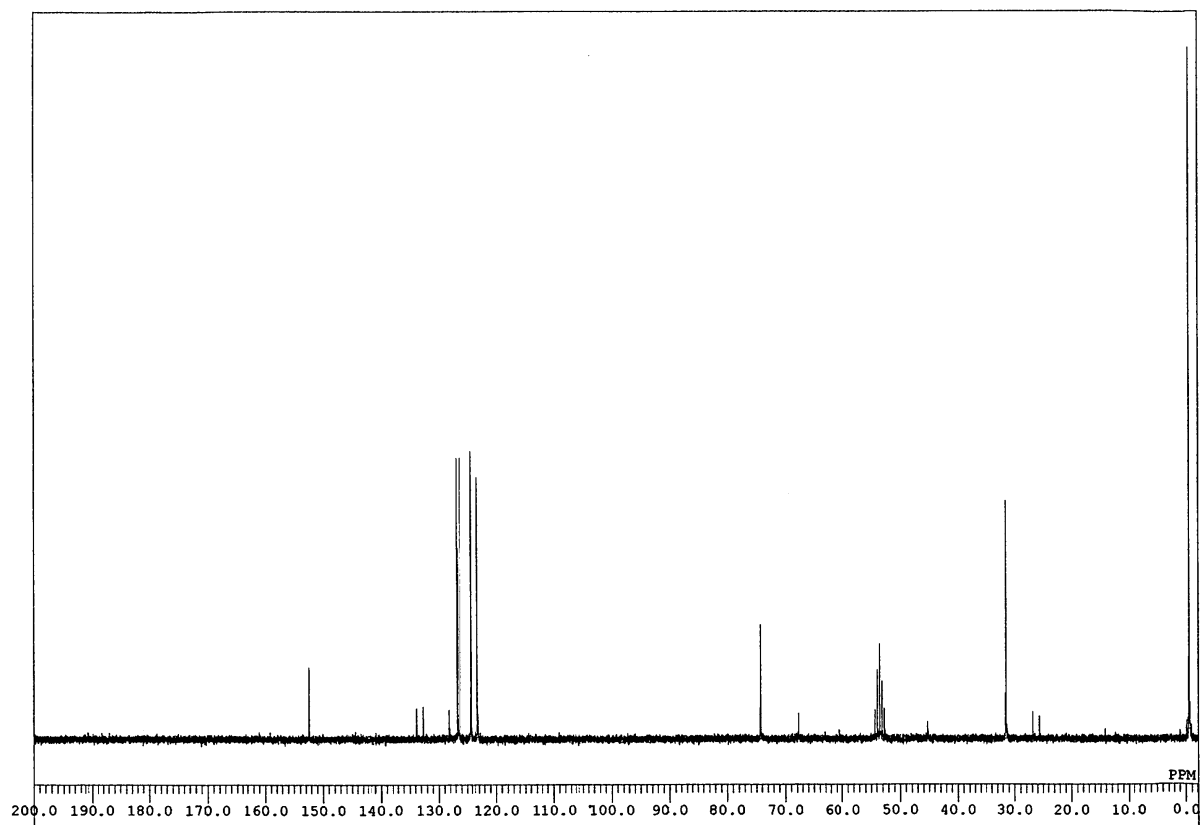

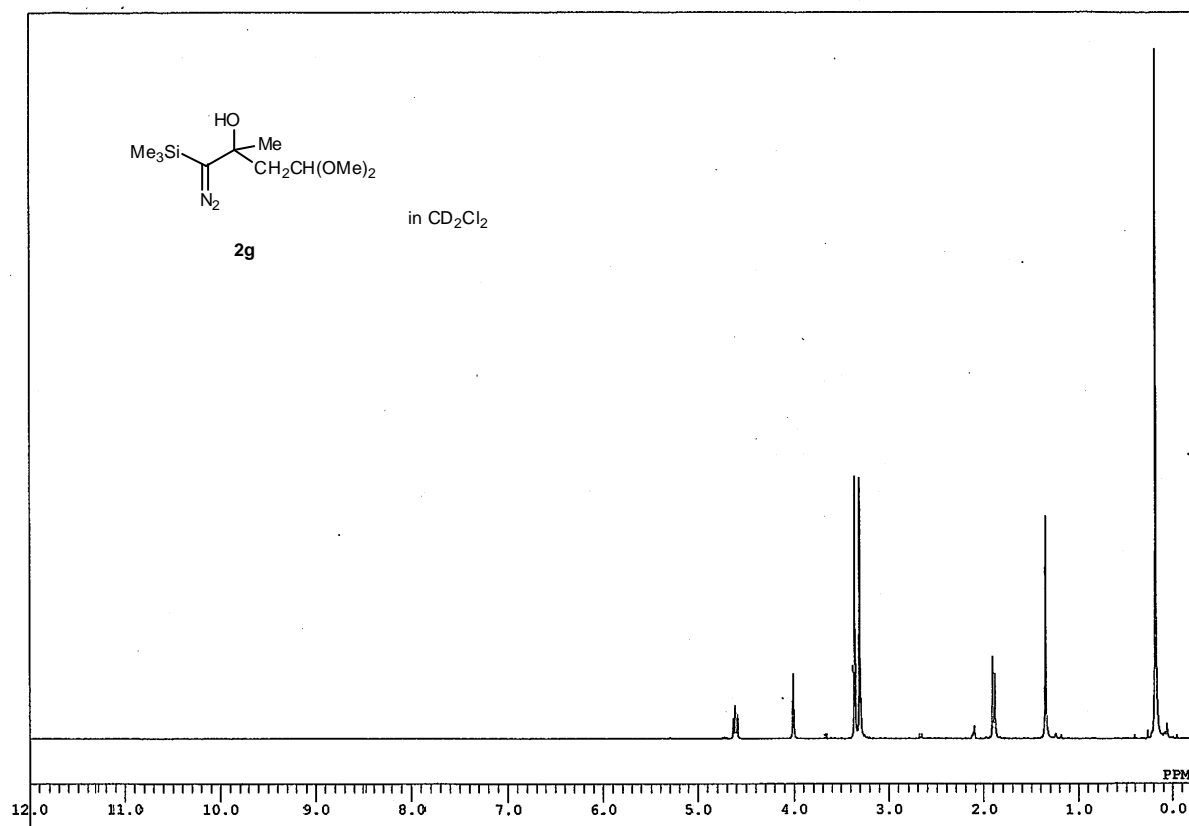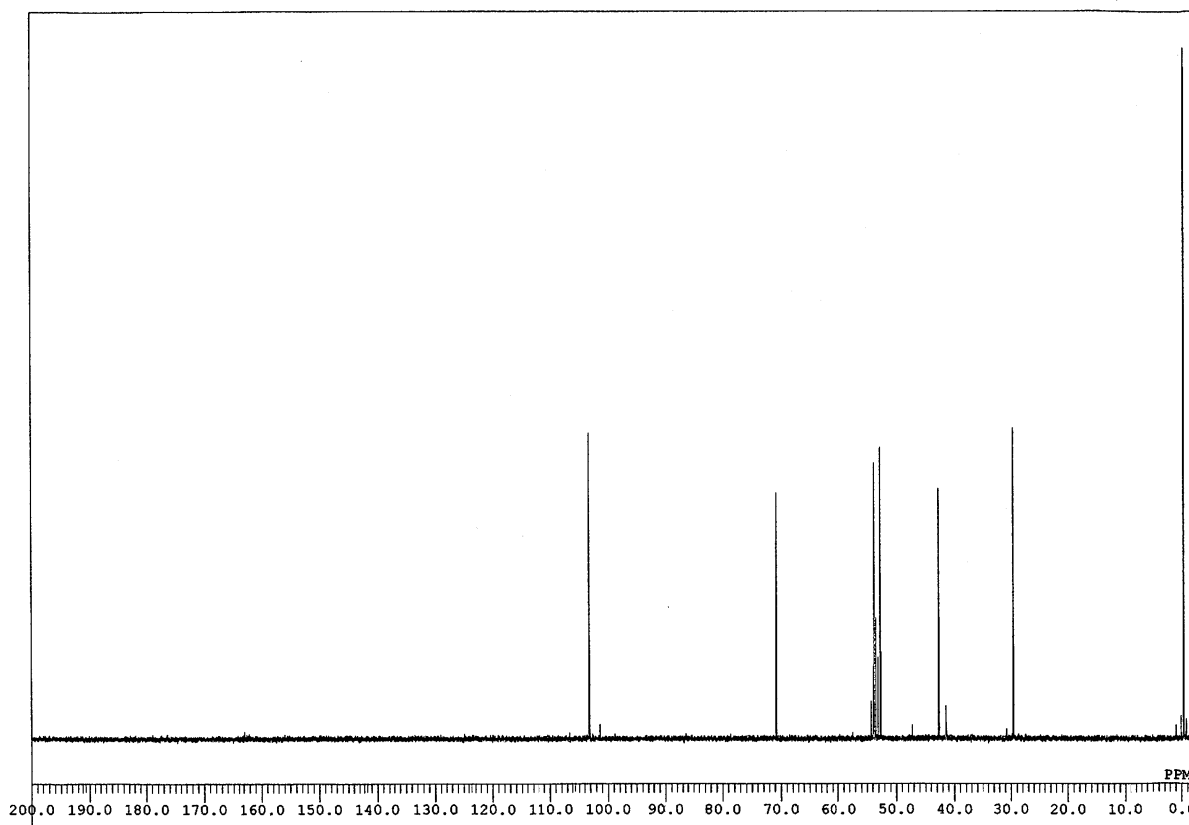

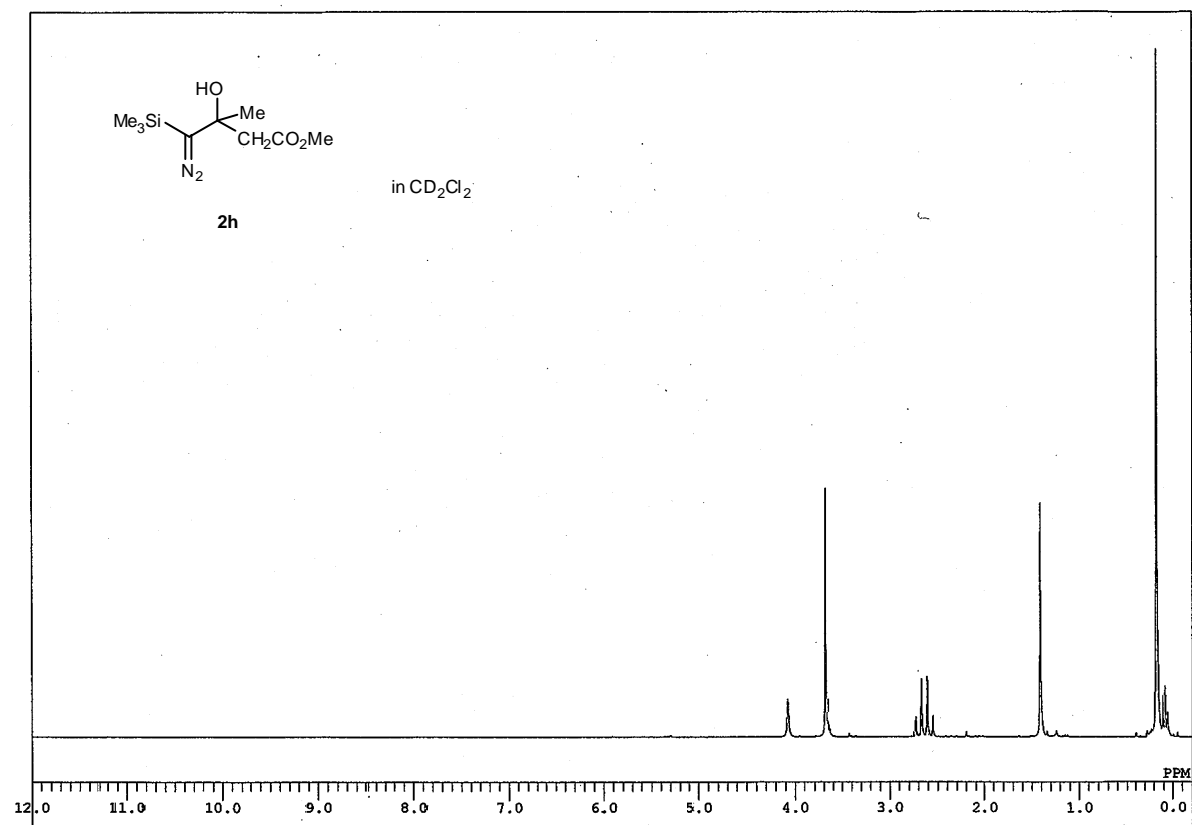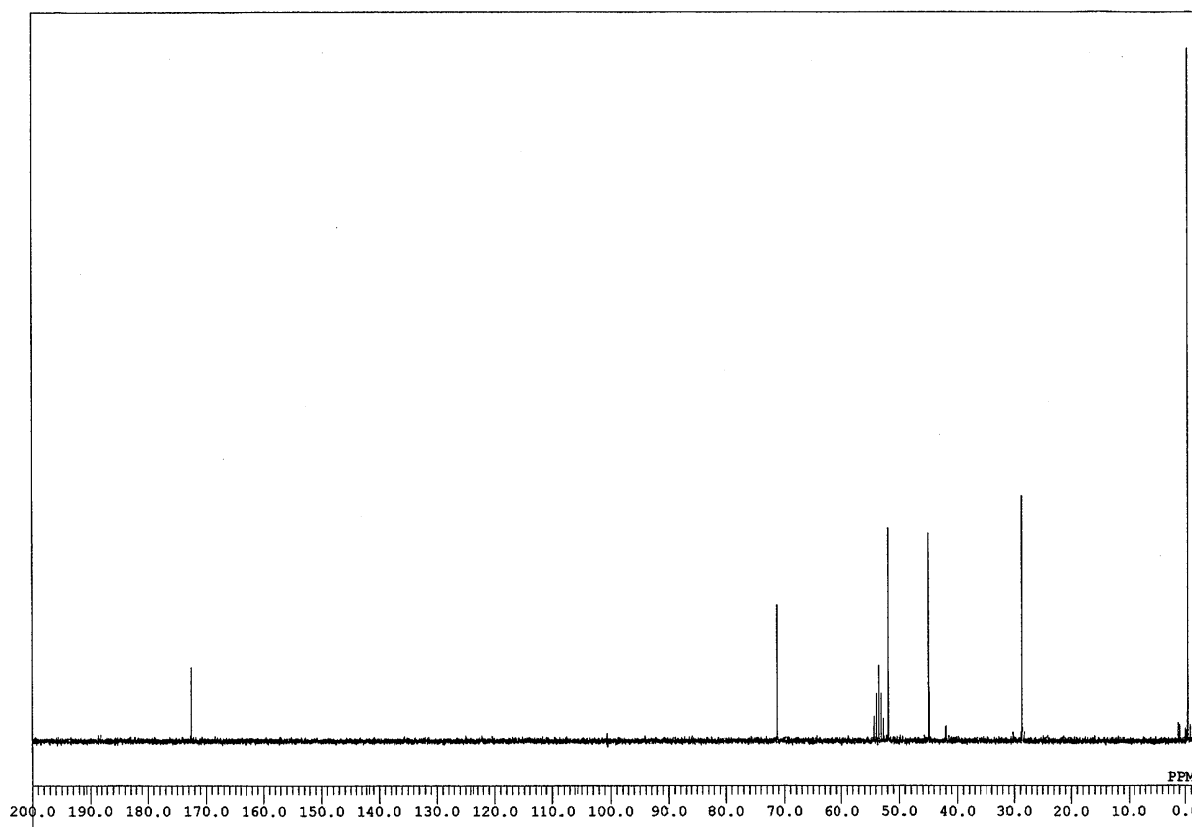

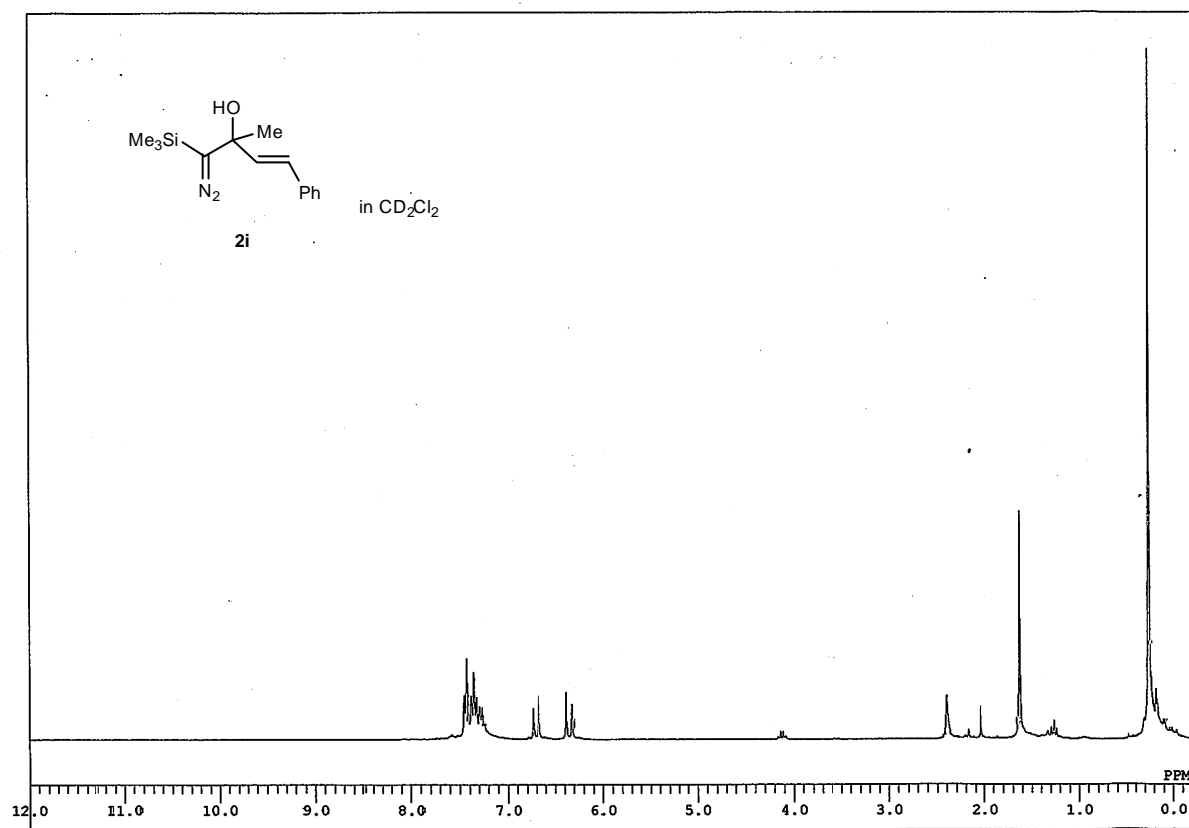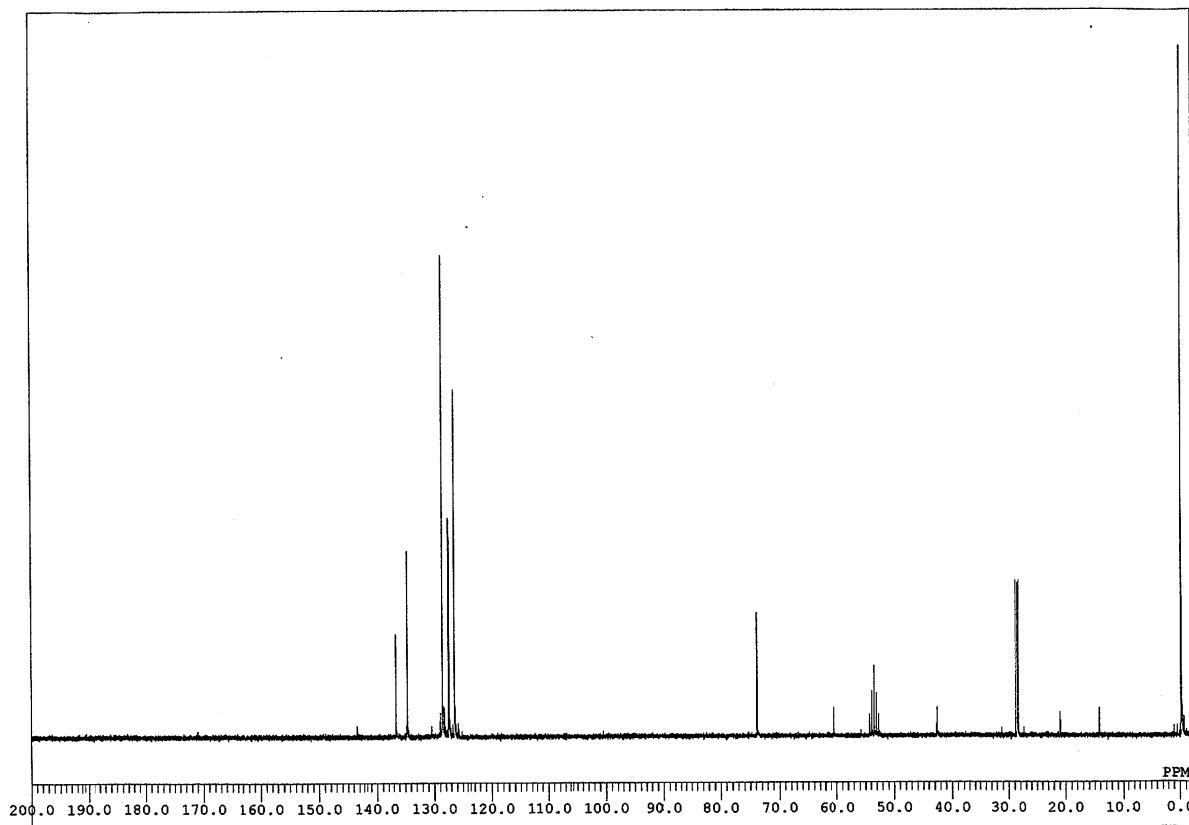

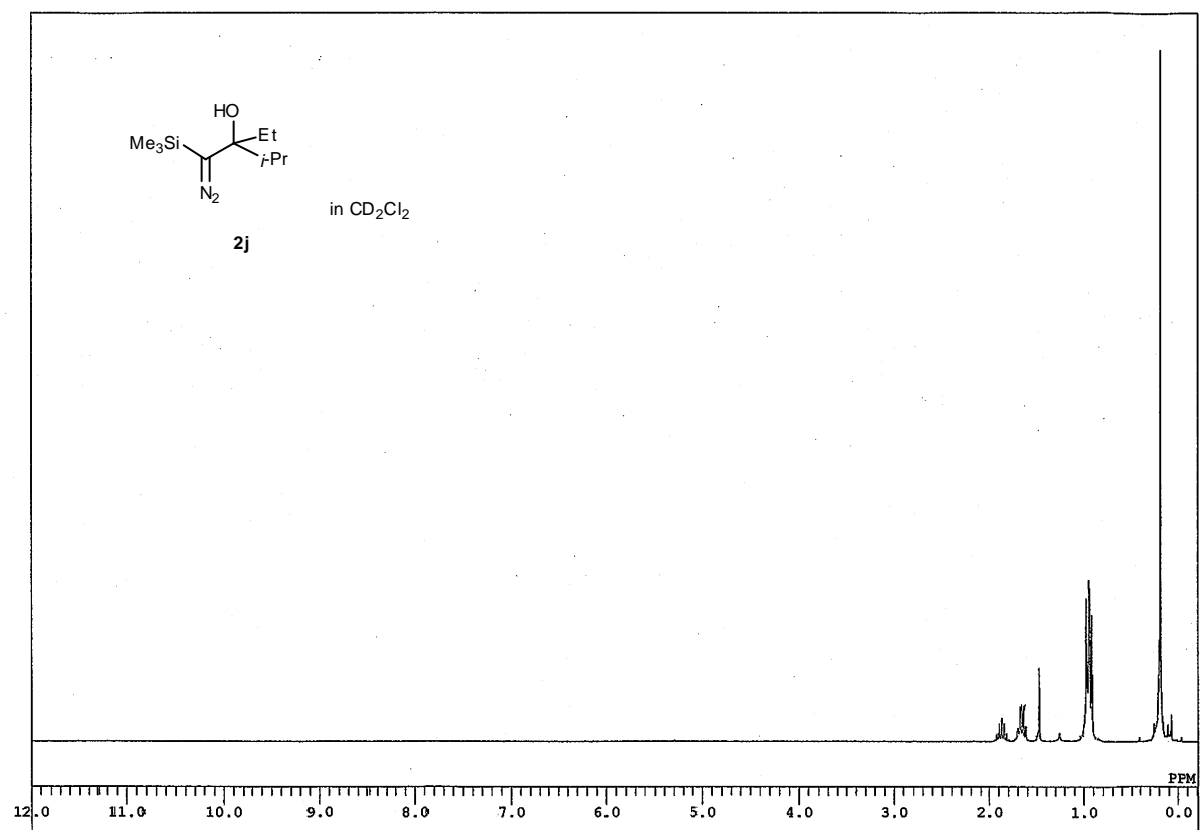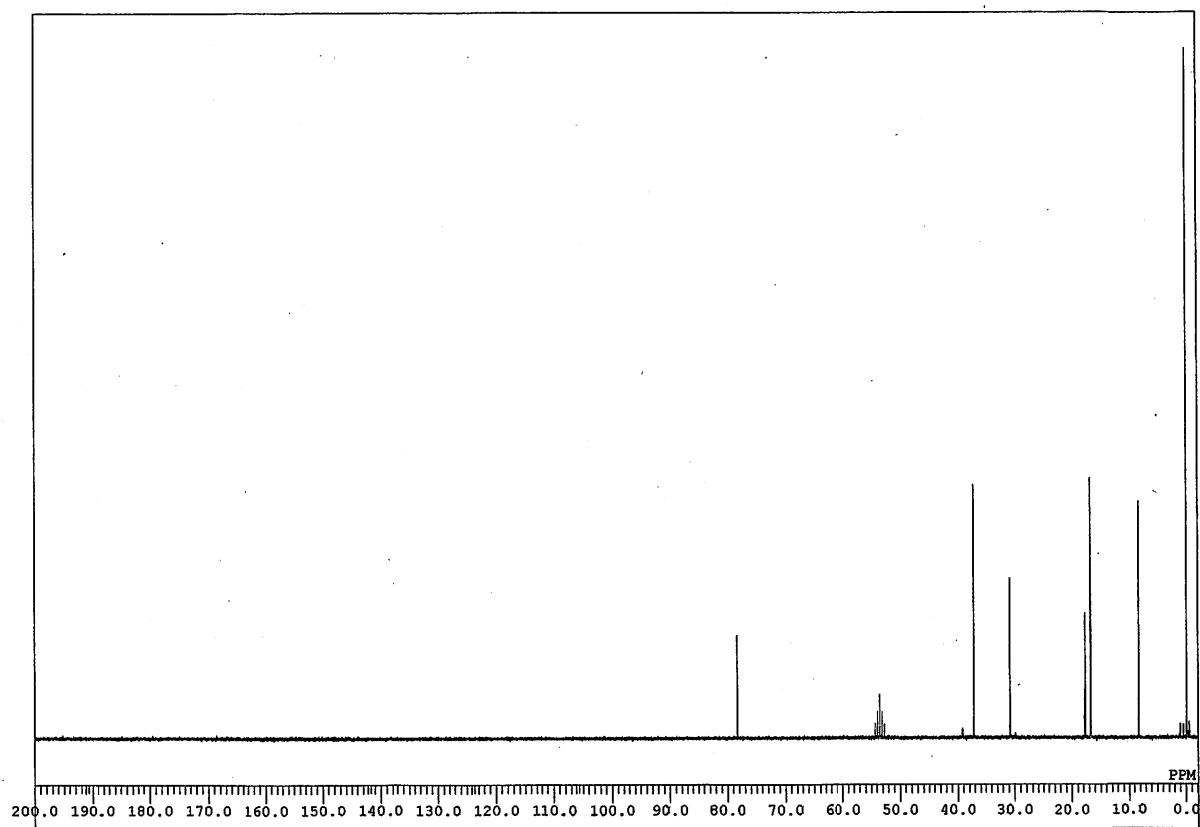

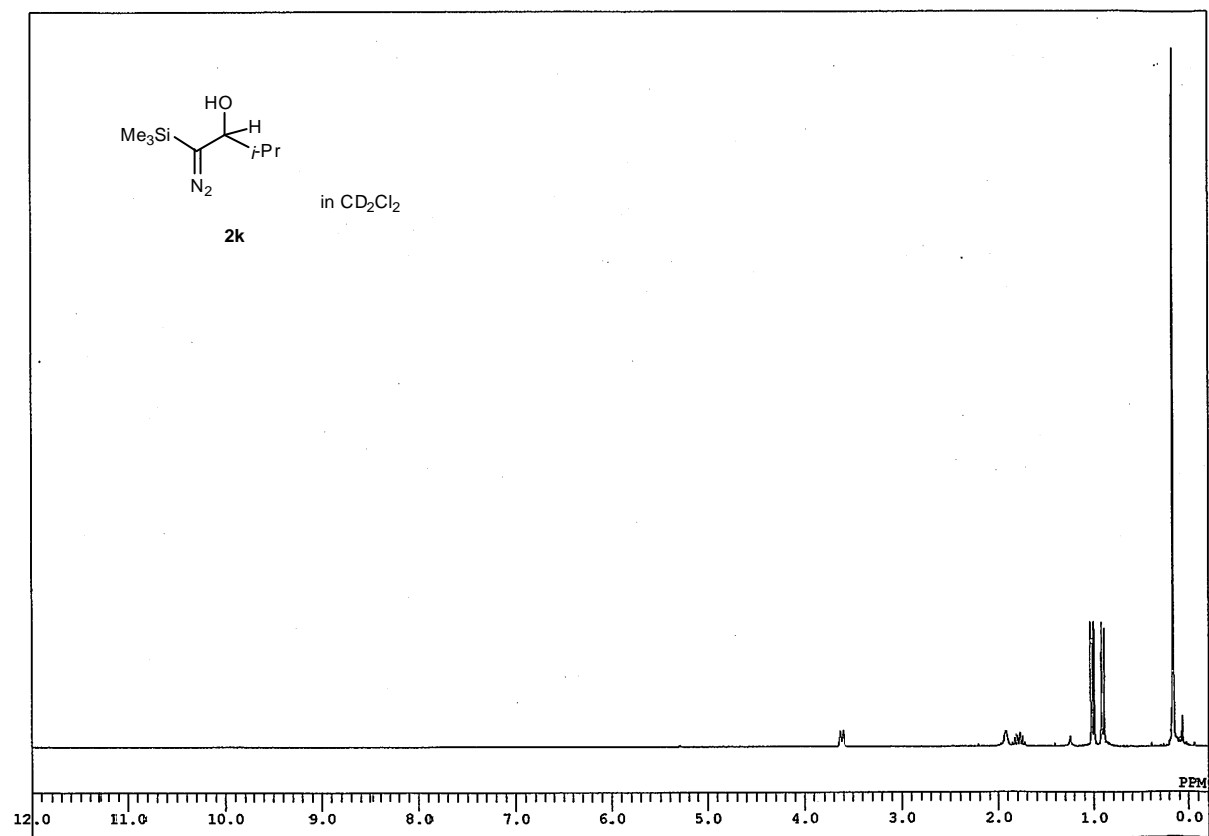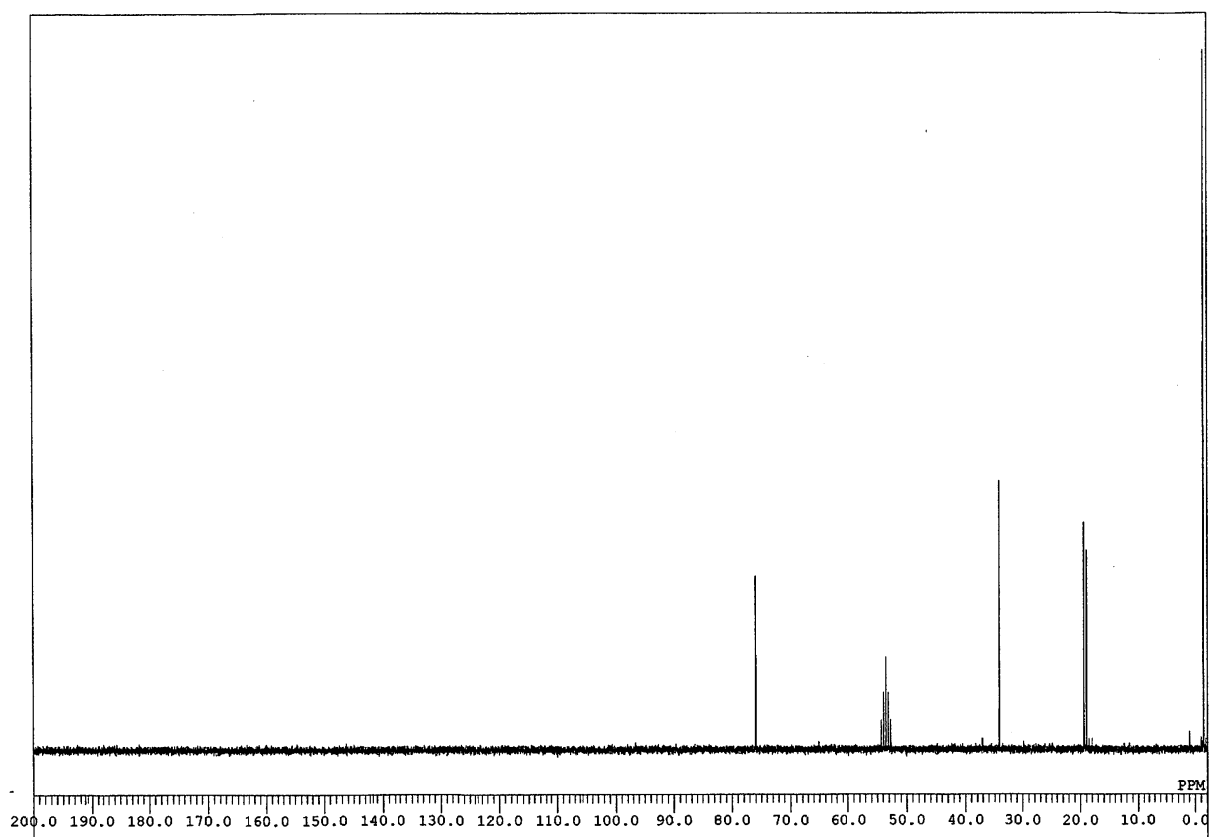

Supplement: b907796k.pdf [file b907796k.pdf]
